# Supplementary material for: Biological Evaluation, Molecular Docking Analyses, and ADME Profiling of Certain New Quinazolinones as Anti-colorectal Agents
Source: PubMed Central journal article supplement — ACS Omega. 2022 May 23;7(22):18443–58. doi: 10.1021/acsomega.2c00812 (PMC9178606; doi:10.1021/acsomega.2c00812), 2022-05-23

# **Biological Evaluation, Molecular Docking Analyses and ADME Profiling of Certain New Quinazolinones as Anti-colorectal Agents**

Nahed N. E. El-Sayed<sup>a\*</sup>, Norah M. Almanei<sup>b</sup>, Abir Ben Bacha<sup>c,d</sup>, Mohamed K. El-Ashrey<sup>e,f</sup>, Maha I. Al-Zaben<sup>b</sup>, Zainab M. Almarhoon<sup>b\*</sup>

<sup>a</sup>National Organization for Drug Control and Research, Egyptian Drug Authority, 51 Wezaret El-Zerra St., Giza 35521, Egypt

<sup>b</sup>Department of Chemistry, College of Science, King Saud University, P.O. Box 2455, Riyadh 11451, Saudi Arabia

<sup>c</sup>Biochemistry Department, College of Science, King Saud University, P.O. Box 22452, Riyadh 11495, Saudi Arabia

<sup>d</sup>Laboratory of Plant Biotechnology Applied to Crop Improvement, Faculty of Science of Sfax, University of Sfax, Sfax 3038, Tunisia

<sup>e</sup>Pharmaceutical Chemistry Department, Faculty of Pharmacy, Cairo University, Kasr Elini St., Cairo 11562, Egypt

<sup>f</sup>Medicinal Chemistry Department, Faculty of Pharmacy, King Salman International University, Ras-Sedr, South Sinai, Egypt

\*Corresponding authors

*Email address:* nahed.elsayed@edaegypt.gov.eg; nnelsayed@gmail.com (Nahed Nasser Eid El-Sayed); zalmarhoon@ksu.edu.sa

## **Supplementary information**

**Table S1.** The values of the minimized total energies of *E* and *Z* isomers of Schiff bases **3a-g** and compound **5**

| 2D/ 3D-minimized <i>E</i> -isomer                                                                                                           | 2D/3D-minimized <i>Z</i> -isomer                                                                                                             |
|---------------------------------------------------------------------------------------------------------------------------------------------|----------------------------------------------------------------------------------------------------------------------------------------------|
| <p><b>3a</b></p> 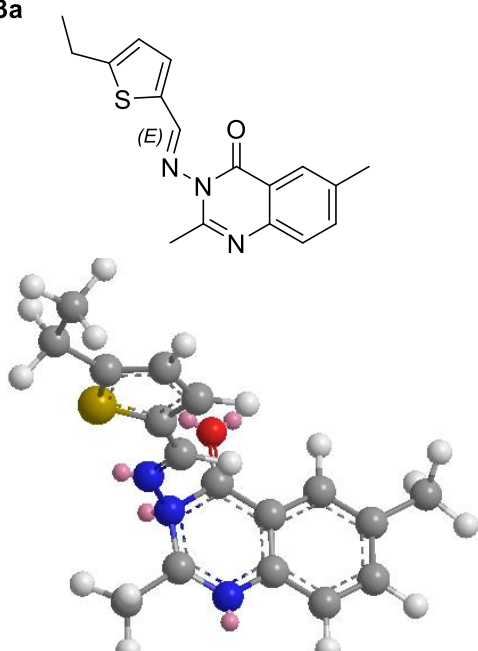 <p>Total energy = 28.8470 kcal/mol</p>  | <p><b>3a</b></p>  <p>Total energy = 29.3365 kcal/mol</p>  |
| <p><b>3b</b></p>  <p>Total energy = 17.8970 kcal/mol</p> | <p><b>3b</b></p>  <p>Total energy = 21.5747 kcal/mol</p> |

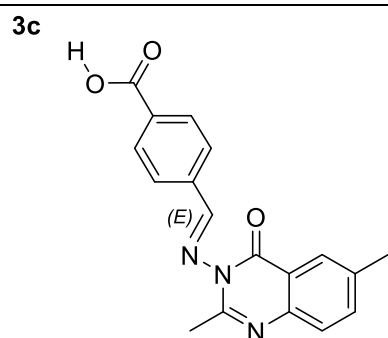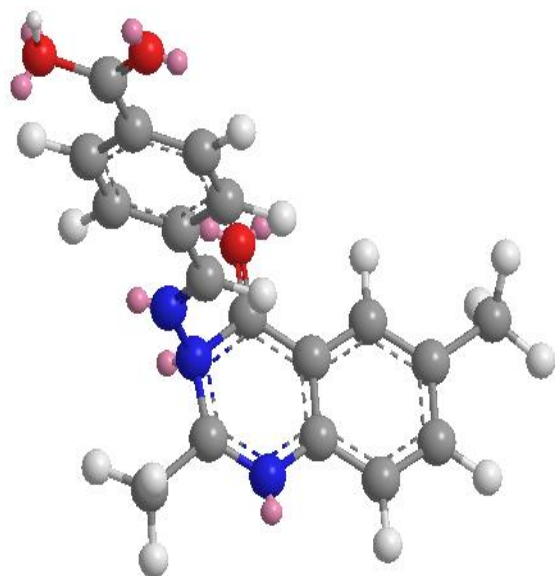

Total energy: 19.1689 kcal/mol

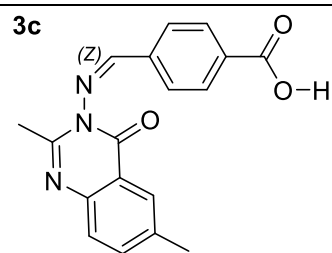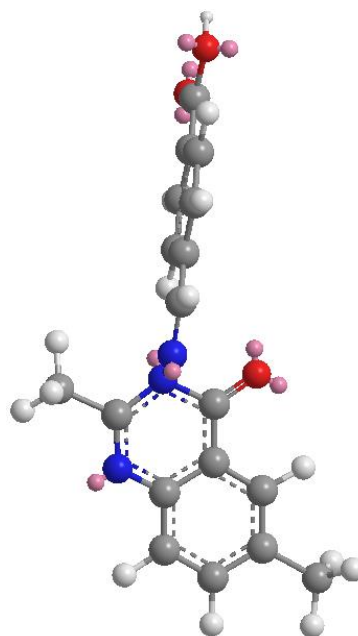

Total energy: 20.1828 kcal/mol

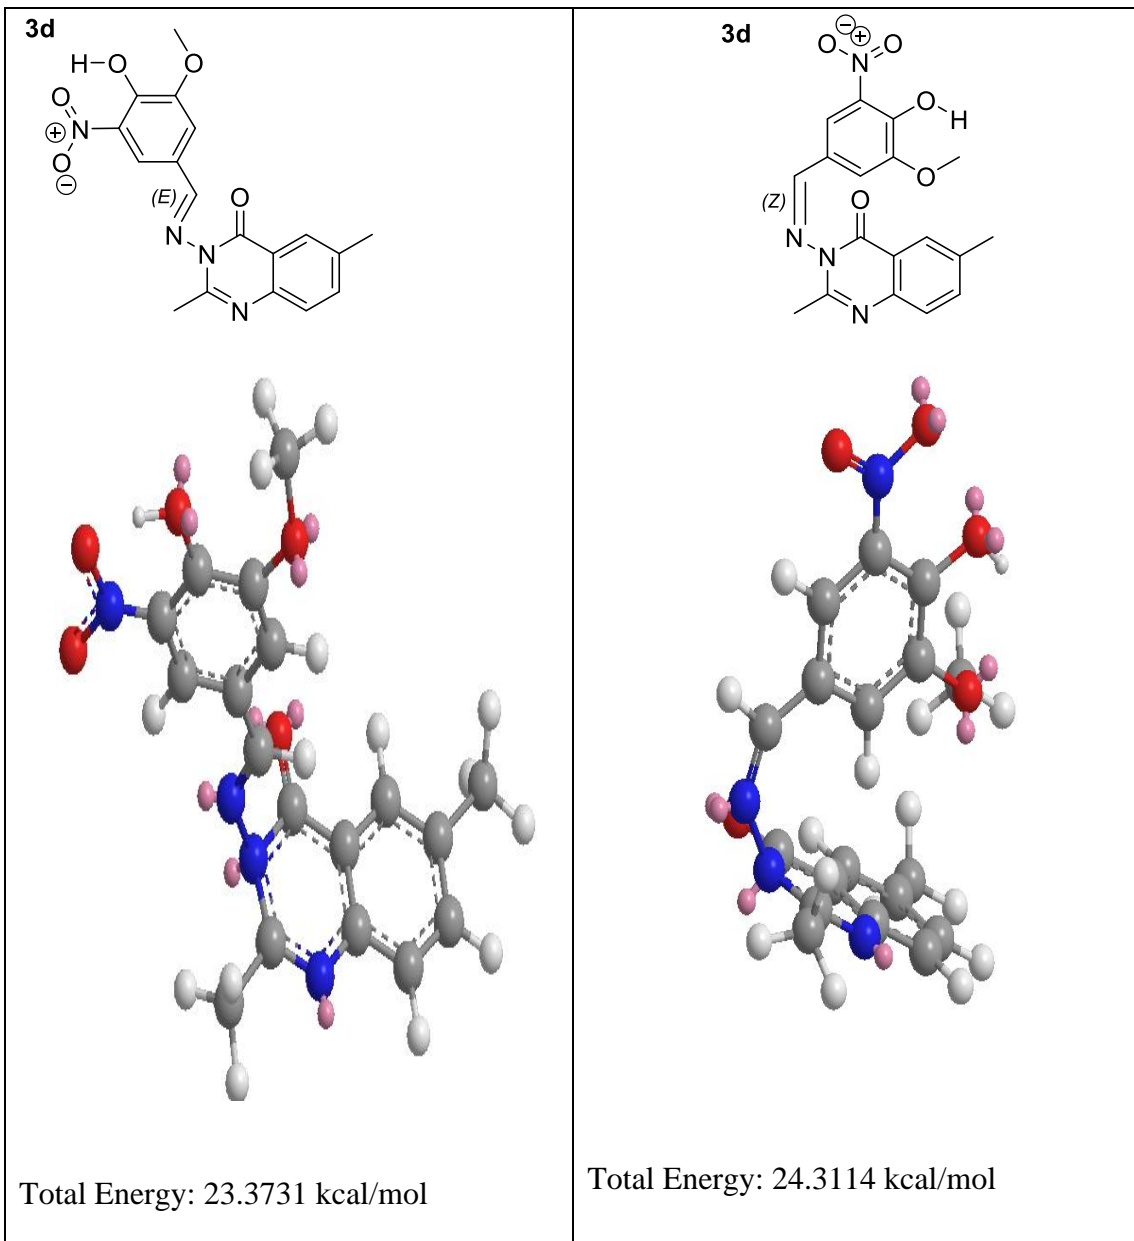

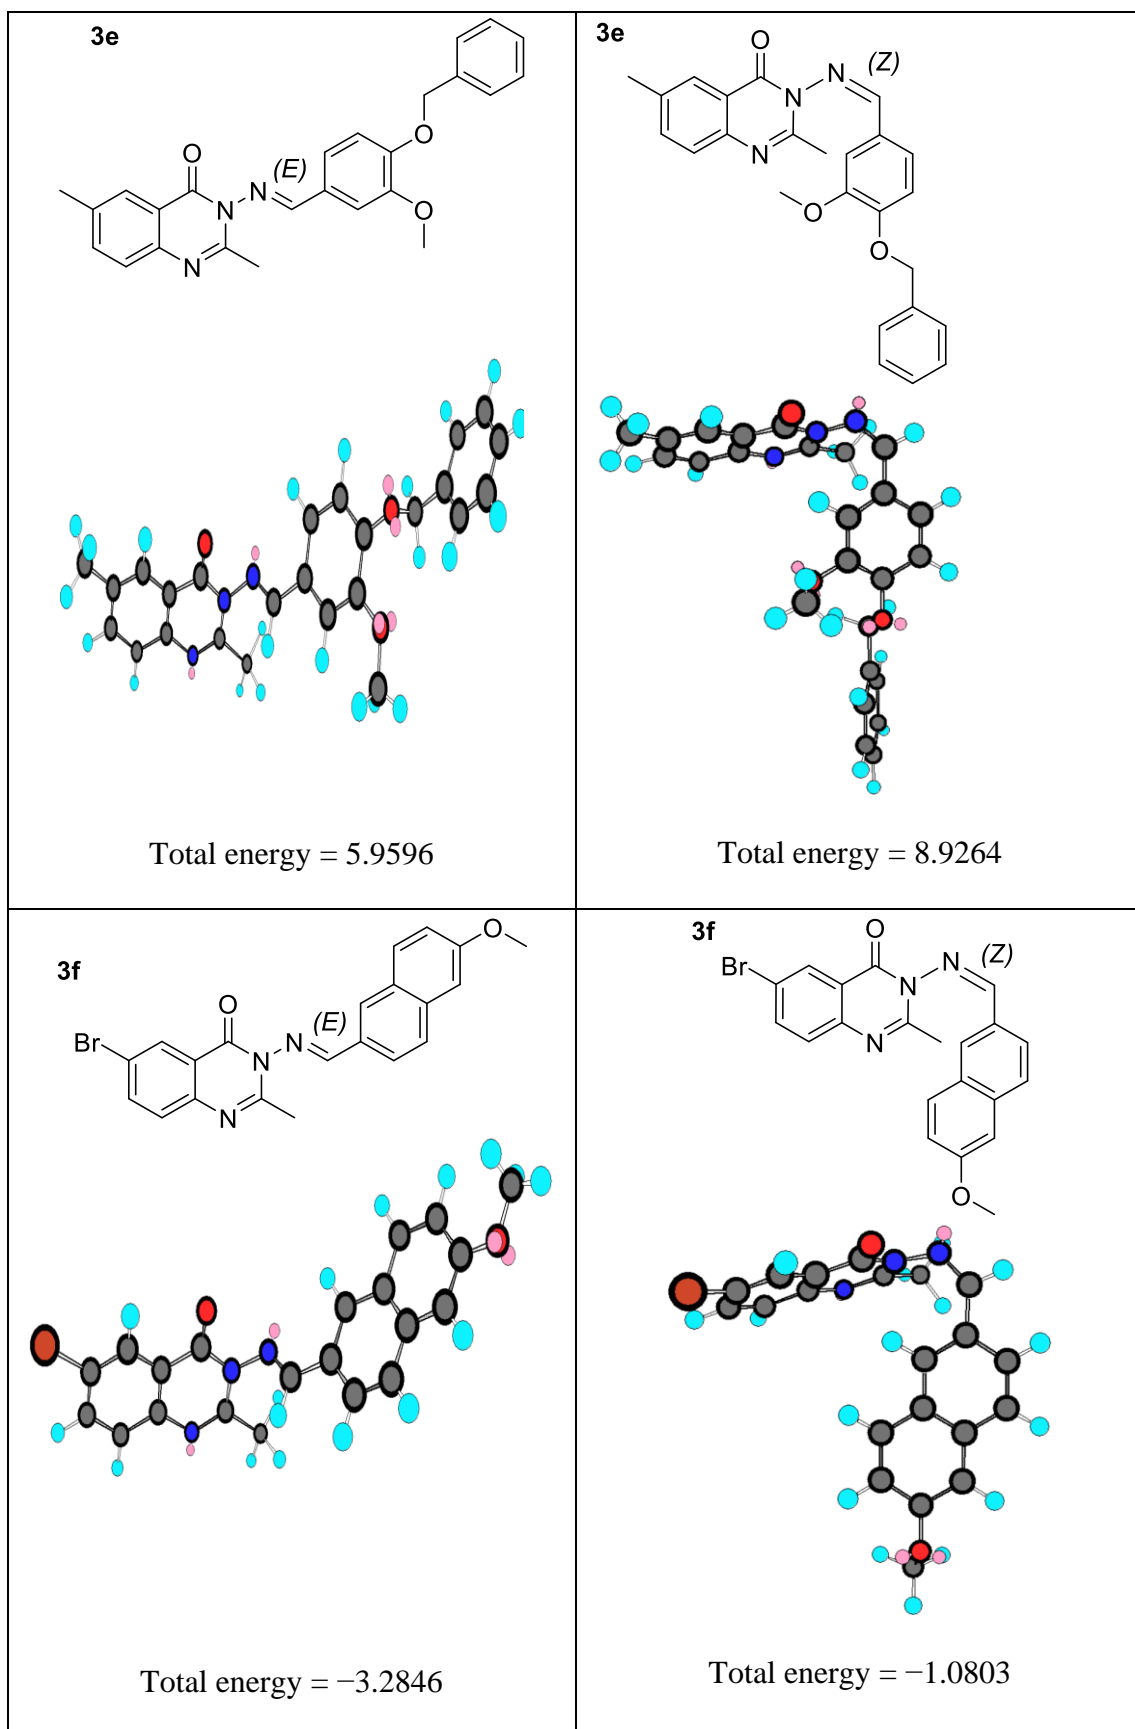

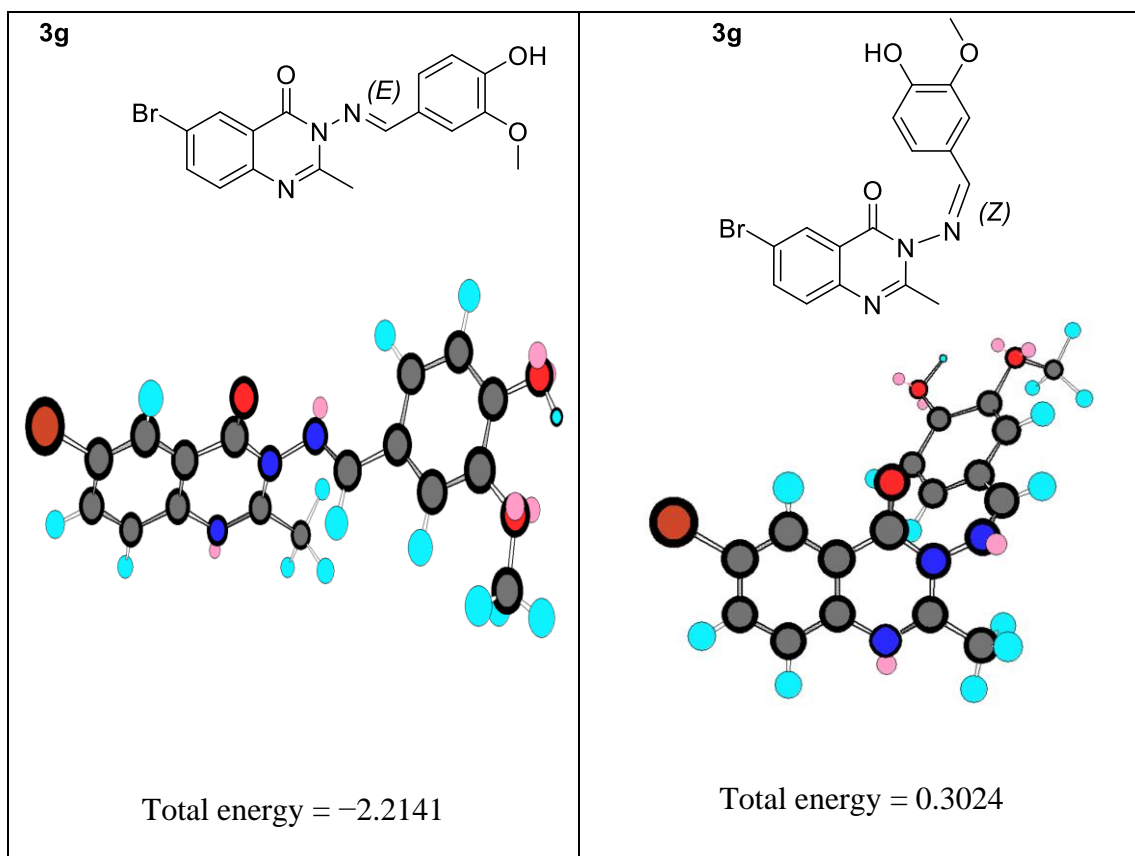

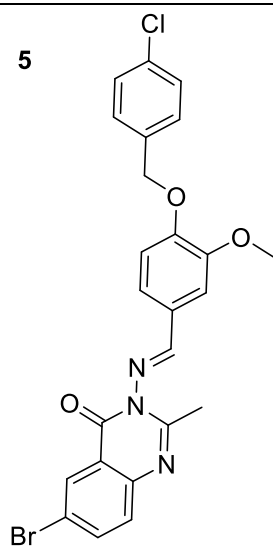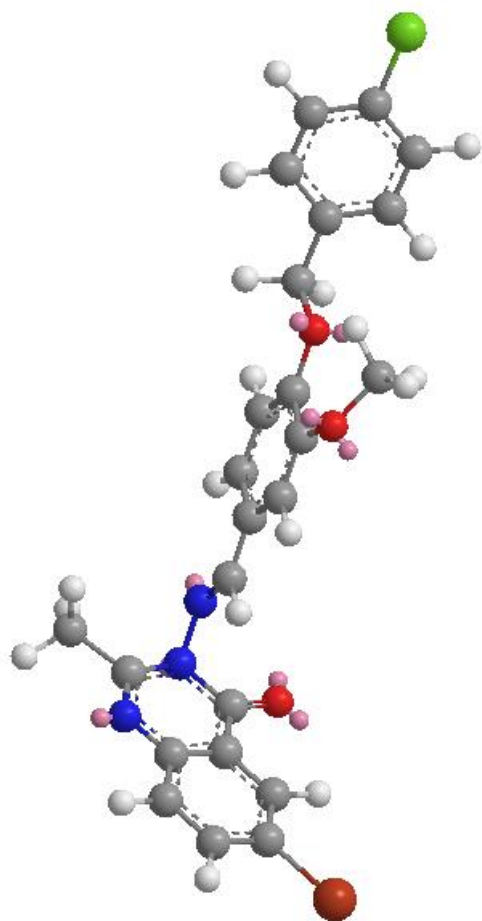

Total energy = 29.1194 kcal/mol

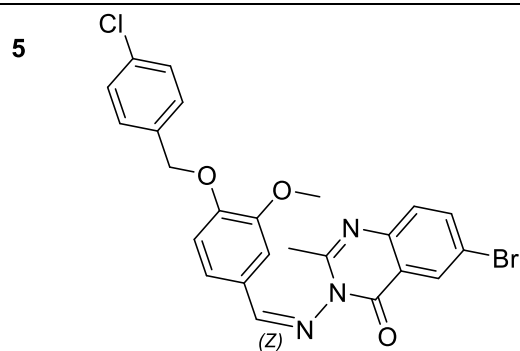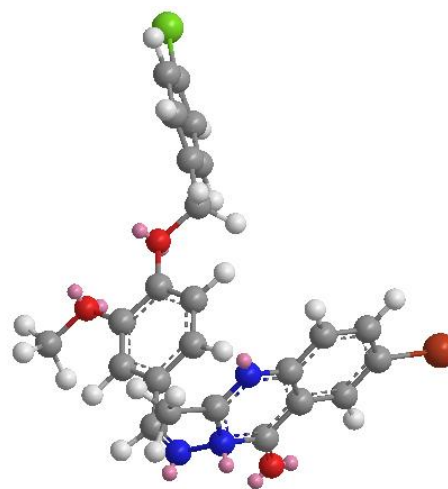

Total energy = 35.5597 kcal/mol

**Table S2.** The mean IC<sub>50</sub> values (µg/mL) of the synthesized derivatives against selected proteases. Results are the mean values of two separate determinations ± SD.

| <b>Compound #</b> | <b>Cathepsin-B</b> | <b>Collagenase</b> | <b>Thrombin</b> | <b>Elastase</b> | <b>Trypsin</b> |
|-------------------|--------------------|--------------------|-----------------|-----------------|----------------|
| <b>1a</b>         | 24.00±2.83         | 27.00±1.41         | 2.30±0.42       | 2.30±0.28       | 2.00±0.00      |
| <b>1c</b>         | 28.50±2.12         | 2.50±0.71          | 14.00±1.41      | 15.50±2.12      | 17.50±2.12     |
| <b>3a</b>         | 36.61±1.83         | 47.69±1.59         | 83.65±4.78      | 34.04±1.83      | 69.85±3.40     |
| <b>3b</b>         | 12.94±1.09         | 24.86±1.47         | 18.77±0.91      | 56.06±2.38      | 82.08±1.09     |
| <b>3c</b>         | 24.12±1.09         | 18.52±1.56         | 37.34±4.39      | 100.36±5.51     | 109.85±1.77    |
| <b>3d</b>         | 39.36±2.69         | 57.83±2.69         | 77.24±1.74      | 34.34±1.36      | 20.50±1.74     |
| <b>3e</b>         | 27.93±1.89         | 53.45±3.07         | 11.00±1.55      | 37.97±1.72      | 44.50±2.056    |
| <b>3f</b>         | 55.77±1.85         | 43.57±3.01         | 21.91±0.83      | 25.22±1.18      | 17.17±0.83     |
| <b>3g</b>         | 13.00±2.83         | 18.00±1.41         | 16.50±2.12      | 14.50±0.71      | 18.00±1.41     |
| <b>5</b>          | 23.50±2.12         | 32.50±2.12         | 23.00±1.41      | 26.50±2.12      | 24.50±2.12     |
| <b>7b</b>         | 9.00±1.41          | 12.50±2.12         | 24.00±4.24      | 25.50±2.12      | 28.00±1.41     |
| <b>8</b>          | 23.00±1.41         | 24.50±0.71         | 0.225±0.04      | 0.20±0.00       | 0.55±0.07      |
| <b>9</b>          | 19.50±0.71         | 4.00±1.41          | 23.50±2.12      | 26.00±1.41      | 21.5±2.12      |
| <b>10</b>         | 29.50±2.12         | 28.50±2.12         | 2.35±0.35       | 1.80±0.28       | 1.75±0.35      |
| <b>12</b>         | 30.50±2.12         | 34.00±2.83         | 27.50±3.54      | 25.00±1.41      | 23.50±2.12     |
| <b>Cocktail</b>   | 0.175±0.04         | 0.15±0.07          | 0.25±0.07       | 0.125±0.04      | 0.215±.04      |



**Table S3.** The mean IC<sub>50</sub> values (μM) of the synthesized derivatives against selected phospholipases. Results are the mean values of two separate determinations ± SD.

| Compound #            | Mean IC <sub>50</sub> values (μM) |                         |                         |
|-----------------------|-----------------------------------|-------------------------|-------------------------|
|                       | hsPLA <sub>2</sub> -G-IIA         | hsPLA <sub>2</sub> -G-V | hsPLA <sub>2</sub> -G-X |
| <b>1a</b>             | 22.05±2.23                        | 16.14±0.85              | 21.84±0.64              |
| <b>1c</b>             | 31.97± 0.85                       | 26.26±0.57              | 24.55±0.42              |
| <b>3a</b>             | 58.61±3.40                        | 71.29±2.73              | 109.5±5.01              |
| <b>3b</b>             | 68.10±4.74                        | 33.01±1.37              | 43.37±1.66              |
| <b>3c</b>             | 100.83±6.16                       | 93.67±3.52              | 131.48±5.51             |
| <b>3d</b>             | 30.13±1.14                        | 65.43±1.71              | 21.45±2.31              |
| <b>3e</b>             | 93.72±4.28                        | 70.27±1.89              | 48.01±2.23              |
| <b>3f</b>             | 16.81±1.00                        | 34.10±1.00              | 24.63±2.01              |
| <b>3g</b>             | 30.27±0.35                        | 22.28±0.92              | 14.55±0.92              |
| <b>5</b>              | 49.73±2.12                        | 49.73±0.71              | 41.15±1.56              |
| <b>7b</b>             | 127.42±2.12                       | 112.36±1.49             | 105.90±1.41             |
| <b>8</b>              | 57.01±0.57                        | 68.02±1.41              | 78.71±0.99              |
| <b>9</b>              | 104.21±8.34                       | 151.39±2.12             | 88.47±2.12              |
| <b>10</b>             | 13.84±2.12                        | 14.70±0.42              | 23.43±1.41              |
| <b>12</b>             | 69.31±2.83                        | 113.20±1.41             | 77.39±2.12              |
| <b>Oleanolic acid</b> | 11.50±0.35                        | 16.42±0.71              | 16.53±0.64              |

**Table S4.** The mean IC<sub>50</sub> values expressed in (μM) of the synthesized derivatives against α-amylase, α-glucosidase and xanthine oxidase. Results are the mean values of two separate determinations ± SD.

| Compound #         | Mean IC <sub>50</sub> values μM |               |                         |
|--------------------|---------------------------------|---------------|-------------------------|
|                    | Anti-α-amylase                  | α-Glucosidase | Xanthine oxidoreductase |
| <b>1a</b>          | 399.48±4.95                     | 23.61±1.41    | 159.40±3.54             |
| <b>1c</b>          | 1093±4.95                       | 59.93±2.12    | 339.63±4.95             |
| <b>3a</b>          | 831.73±22.70                    | 37.25±1.83    | 68.41±1.35              |
| <b>3b</b>          | 264.11±10.98                    | 16.44±0.54    | 42.21±2.56              |
| <b>3c</b>          | 625.51±17.6                     | 93.36±4.39    | 102.54±4.17             |
| <b>3d</b>          | 374.64±11.51                    | 54.97±2.88    | 190.04±7.68             |
| <b>3e</b>          | 550.21±25.66                    | 57.44±2.56    | 144.51±5.97             |
| <b>3f</b>          | 310.22±10.04                    | 12.43±0.83    | 7.34±0.33               |
| <b>3g</b>          | 468.8±4.24                      | 25.76±1.41    | 56.67±4.24              |
| <b>5</b>           | 357.85±4.95                     | 13.65±1.41    | 32.18±2.12              |
| <b>7b</b>          | 440.16±7.07                     | 19.86±1.41    | 233.32±2.12             |
| <b>8</b>           | 458.31±9.19                     | 53.44±2.12    | 137.66±4.95             |
| <b>9</b>           | 580.00±3.54                     | 62.91±1.41    | 151.39±4.95             |
| <b>10</b>          | 430.22±8.49                     | 43.66±2.12    | 12.78±1.41              |
| <b>12</b>          | 400.82±6.36                     | 21.03±1.27    | 28.88±2.12              |
| <b>Quercetin</b>   | 406.97±2.83                     | 12.57±0.28    | -----                   |
| <b>Allopurinol</b> | ----                            | ----          | 4.78±0.07               |

**Table S5.** The cytotoxic effects of the studied quinazolinone derivatives. Results are expressed as mean values of % of viable cells at 200 µg/mL and IC<sub>50</sub> values (concentrations required to reduce the viability of cancerous cells by 50% expressed in µM). Results are the mean values of two separate determinations ± SD. ND: Not determined

| Compound No.                                        | LoVo cell line of CRC |                     | HCT-116 cell line of CRC |                     |
|-----------------------------------------------------|-----------------------|---------------------|--------------------------|---------------------|
|                                                     | % of Viable cells     | IC <sub>50</sub> µM | % Viable of cells        | IC <sub>50</sub> µM |
| <b>Positive control<br/>Triton X-100<br/>(0.1%)</b> | 0.00                  |                     | 0.00                     | -                   |
| <b>Negative control<br/>(Assay medium)</b>          | 99.50± 0.71           |                     | 100.00±0.00              | -                   |
| <b>1a</b>                                           | 62.9±1.56             | 1052.80±64.01       | 48.25±1.06               | 757.64±19.48        |
| <b>1c</b>                                           | 28.0±4.24             | 339.63±12.10        | 46.50±2.12               | 530.85±16.15        |
| <b>3a</b>                                           | 89.5±3.54             | ND                  | 86.5±2.12                | ND                  |
| <b>3b</b>                                           | 61.9±2.69             | 651.20±12.82        | 53.5±2.12                | 572.22±14.66        |
| <b>3c</b>                                           | 32.5±2.12             | 320.53±13.20        | 36.0±4.24                | 459.79±12.11        |
| <b>3d</b>                                           | 90.5±3.54             | ND                  | 90.0±5.66                | ND                  |
| <b>3e</b>                                           | 76.5±3.54             | ND                  | 74.5±2.12                | ND                  |
| <b>3f</b>                                           | 58.0±4.24             | 681.63±8.38         | 57.0±2.83                | 552.95±11.72        |
| <b>3g</b>                                           | 16.75±0.35            | 206.07±7.29         | 12.75±1.06               | 284.63±9.11         |
| <b>5</b>                                            | 80.0±2.83             | ND                  | 93.50±2.12               | ND                  |
| <b>7b</b>                                           | 89.5±3.54             | ND                  | 89.00±2.82               | ND                  |
| <b>8</b>                                            | 13.50±0.71            | 319.04±11.45        | 28.00±1.41               | 448.60±11.46        |
| <b>9</b>                                            | 63.0±2.83             | 831.66±19.46        | 73.50±2.12               | 1450.99±22.24       |
| <b>10</b>                                           | 22.00±1.41            | 272.62±9.04         | 4.75± 0.35               | 230.02±9.04         |
| <b>12</b>                                           | 59.5±3.54             | 607.59±13.07        | 54.5±2.12                | 573.13±8.17         |

**Table S6.** The studied target proteins, their PDB code and cocrystallized ligands.

| <b>Target Protein</b>    | <b>PDB Code</b> | <b>Cocrystallized ligand</b>                                                                                                                                                                                    |
|--------------------------|-----------------|-----------------------------------------------------------------------------------------------------------------------------------------------------------------------------------------------------------------|
| Thrombin                 | 1ETR            | Amino{[(4 <i>S</i> )-5-[(2 <i>R</i> ,4 <i>R</i> )-2-carboxy-4-methylpiperidin-1-yl]-4-({[(3 <i>R</i> )-3-methyl-1,2,3,4-tetrahydroquinolin-8-yl]sulfonyl}amino)-5-oxopentyl]amino} methaniminium ( <b>MIT</b> ) |
| Elastase                 | 1EAT            | 2-[5-Methanesulfonylamino-2-(4-aminophenyl)-6-oxo-1,6-dihydro-1-pyrimidinyl]- <i>n</i> -(3,3,3-trifluoro-1-isopropyl-2-oxopropyl)acetamide ( <b>TFI</b> )                                                       |
| Trypsin                  | 3AAV            | 3,3'-[ethane-1,2-diylbis(nitrilomethylidene)] bis(4-hydroxybenzenecarboximidamide) ( <b>A2C</b> )                                                                                                               |
| sPLA <sub>2</sub> -G-IIA | 1KQU            | 6-Phenyl-4( <i>R</i> )-(7-phenyl-heptanoylamino)-hexanoic acid ( <b>BR4</b> )                                                                                                                                   |
| sPLA <sub>2</sub> -G-X   | 5G3M            | 4-Benzylbenzamide ( <b>9JH</b> )                                                                                                                                                                                |
| $\alpha$ -Glucosidase    | 2JKP            | Castanospermine ( <b>CTS</b> )                                                                                                                                                                                  |
| Xanthine oxidoreductase  | 3ETR            | 2,4-Pteridinediol, Lumazine, ( <b>LUZ</b> )                                                                                                                                                                     |
| $\alpha$ -Amylase        | 1B2Y            | Acarbose ( <b>AC1</b> )                                                                                                                                                                                         |

**Table S7.** Binding score (S) of the cocrystallized ligands & root square deviation (RMSD) values

| <b>Target Protein</b>     | <b>S-score (Kcal/mol)</b> | <b>RMSD values (Å)</b> |
|---------------------------|---------------------------|------------------------|
| Thrombin                  | -15.0807                  | 1.0730                 |
| Elastase                  | -11.4465                  | 0.9243                 |
| Trypsin                   | -14.3302                  | 0.2877                 |
| hsPLA <sub>2</sub> -G-IIA | -13.9194                  | 0.5614                 |
| hsPLA <sub>2</sub> -G-X   | -8.9121                   | 0.1342                 |
| α-Amylase                 | -19.7135                  | 1.1470                 |
| α-Glucosidase             | -15.3919                  | 0.2274                 |
| Xanthine oxidoreductase   | -12.5689                  | 0.1073                 |

**Table S8.** Docking results

| Comp. No.             | Target                    | S (kcal/mol) | Amino acids | Interacting groups                 | Type of interaction   |
|-----------------------|---------------------------|--------------|-------------|------------------------------------|-----------------------|
| 8                     | Thrombin                  | -10.4683     | Ser195      | O (C=O)                            | Conventional H-bond   |
|                       |                           |              | Trp215      | Benzene                            | Amide-Pi Stacked      |
|                       |                           |              | Cys191      | Pyrimidine                         | Amide-Pi Stacked      |
|                       |                           |              | Ala190      | Cl                                 | Pi-Alkyl interaction  |
|                       |                           |              | Val213      | Cl                                 | Pi-Alkyl interaction  |
|                       |                           |              | Tyr228      | Cl                                 | Pi-Alkyl interaction  |
| 8                     | Elastase                  | -9.8673      | Gln192      | O (C=O)                            | Conventional H-bond   |
|                       |                           |              | Gly193      | O (C=O)                            | Conventional H-bond   |
|                       |                           |              | Asp194      | O (C=O)                            | Conventional H-bond   |
|                       |                           |              | Ser195      | O (C=O)                            | Conventional H-bond   |
|                       |                           |              | Val216      | S                                  | Conventional H-bond   |
|                       |                           |              | Val99       | Benzene/Pyrimidine/CH <sub>3</sub> | Pi-Alkyl interaction  |
|                       |                           |              | His57       | CH <sub>3</sub>                    | Alkyl interaction     |
|                       |                           |              | Trp172      | Cl                                 | Pi-alkyl interaction  |
|                       |                           |              | Arg217      | Cl/Benzene                         | Pi-Alkyl interaction  |
| 8                     | Trypsin                   | -10.1979     | Trp193      | Benzene/Pyrimidine                 | Amide-Pi Stacked      |
|                       |                           |              | Ser195      | Cl                                 | Halogen bond          |
|                       |                           |              | Lys202      | Cl                                 | Halogen bond          |
|                       |                           |              | His40       | CH <sub>3</sub>                    | Pi-Alkyl interaction  |
|                       |                           |              | Val191      | CH <sub>3</sub>                    | Alkyl interaction     |
| <b>Oleanolic acid</b> | hsPLA <sub>2</sub> -G-IIA | -12.4222     | Thr61       | O (OH)                             | Conventional H-bond   |
|                       |                           |              | Lys62       | O (C=O)                            | Conventional H-bond   |
|                       |                           |              | Thr51       | CH <sub>3</sub>                    | Alkyl interaction     |
|                       |                           |              | Lys52       | CH <sub>3</sub>                    | Alkyl interaction     |
|                       |                           |              | His47       | CH <sub>3</sub>                    | Pi-Alkyl interaction  |
|                       |                           |              | Leu2        | CH <sub>3</sub>                    | Alkyl interaction     |
|                       |                           |              | Phe5        | CH <sub>3</sub>                    | Alkyl interaction     |
| 10                    | hsPLA <sub>2</sub> -G-IIA | -12.3560     | Gly29       | NH                                 | Conventional H-bond   |
|                       |                           |              | Gly31       | O (C=O)                            | Conventional H-bond   |
|                       |                           |              | Lys62       | O (C=O)                            | Conventional H-bond   |
|                       |                           |              | Asp48       | Pyrimidine                         | Pi-Anion interaction  |
|                       |                           |              | Glu55       | Benzene                            | Pi-Anion interaction  |
|                       |                           |              | His47       | S                                  | Pi-Cation interaction |
|                       |                           |              | Phe5        | S                                  | Pi-Sulfur interaction |
|                       |                           |              | Tyr51       | CH <sub>3</sub>                    | Pi-Pi T-Shaped        |
|                       |                           |              | Lys52       | Benzene                            | Pi-Alkyl              |
|                       |                           |              | Cys44       | Benzene                            | Pi-Alkyl              |
|                       |                           |              | Ala17       | Benzene                            | Pi-Alkyl              |
|                       |                           |              | Ala18       | Benzene                            | Pi-Alkyl              |
|                       |                           |              | Leu2        | Pyrimidine                         | Pi-Alkyl              |
| <b>Oleanolic acid</b> | hsPLA <sub>2</sub> -G-X   | -13.1880     | Gly28       | O (C=O)                            | Conventional H-bond   |
|                       |                           |              | His46       | OH                                 | Conventional H-bond   |
|                       |                           |              | Leu5        | CH <sub>3</sub>                    | Alkyl interaction     |
|                       |                           |              | Ala6        | CH <sub>3</sub>                    | Alkyl interaction     |
|                       |                           |              | Pro17       | CH <sub>3</sub>                    | Pi-Alkyl interaction  |
|                       |                           |              | Ile18       | CH <sub>3</sub>                    | Alkyl interaction     |
|                       |                           |              | Met21       | CH <sub>3</sub>                    | Alkyl interaction     |
|                       |                           |              | Leu29       | CH <sub>3</sub>                    | Alkyl interaction     |
|                       |                           |              | Tyr50       | CH <sub>3</sub>                    | Pi-Alkyl interaction  |

|                    |                            |          |                                                                        |                                                                                                  |                                                                                                                                                     |
|--------------------|----------------------------|----------|------------------------------------------------------------------------|--------------------------------------------------------------------------------------------------|-----------------------------------------------------------------------------------------------------------------------------------------------------|
| <b>3g</b>          | hsPLA <sub>2</sub> -G-X    | -11.7267 | Leu29<br>His46<br>Lys61<br>Asp47<br>Leu5<br>Leu29                      | N (Pyrimidine)<br>O (C=O)<br>Phenyl/Pyrimidine<br>Phenyl/Pyrimidine<br>Phenyl<br>CH <sub>3</sub> | Carbon-hydrogen bond<br>Carbon-hydrogen bond<br>Pi-cation interaction<br>Pi-anion interaction<br>Pi-alkyl interaction<br>Alkyl interaction          |
| <b>Quercetin</b>   | $\alpha$ -Glucosidase      | -16.1296 | Glu194<br>Lys467<br>His507<br>Glu532<br>Glu439                         | OH<br>O (C=O)<br>OH<br>OH<br>Pyran                                                               | Conventional H-bond<br>Conventional H-bond<br>Conventional H-bond<br>Conventional H-bond<br>Pi-Anion                                                |
| <b>3f</b>          | $\alpha$ -Glucosidase      | -14.5846 | Glu439<br>Phe401<br>Trp341<br>Phe536<br>Val471                         | Benzene<br>Pyrimidine<br>Benzene<br>CH <sub>3</sub><br>Benzene                                   | Pi-Anion interaction<br>Pi-Pi Stacked<br>Pi-Pi Stacked<br>Pi-Alkyl interaction<br>Pi-Alkyl interaction                                              |
| <b>Allopurinol</b> | Xanthine<br>oxidoreductase | -9.1790  | Glu802<br>Arg880<br>Thr1010<br>Phe914<br>Phe1009<br>Ala1078<br>Ala1079 | NH<br>O (C=O)<br>O (C=O)<br>Benzene<br>Benzene<br>Benzene<br>Benzene                             | Conventional H-bond<br>Conventional H-bond<br>Conventional H-bond<br>Pi-Pi Stacked<br>Pi-Pi Stacked<br>Pi-Alkyl interaction<br>Pi-Alkyl interaction |
| <b>3f</b>          | Xanthine<br>oxidoreductase | -14.9338 | Arg912<br>Ser1080<br>Phe914<br>Phe1009<br>Ala910<br>Ala1079            | N (Pyrimidine)<br>O (C=O)<br>Benzene<br>Benzene<br>Benzene<br>Benzene                            | Conventional H-bond<br>Conventional H-bond<br>Pi-Pi Stacked<br>Pi-Pi Stacked<br>Pi-Alkyl interaction<br>Pi-Alkyl interaction                        |
| <b>Quercetin</b>   | $\alpha$ -Amylase          | -10.2531 | Trp59<br>Trp59<br>His305                                               | Benzene<br>Pyridine<br>O (C=O)                                                                   | Pi-Pi Stacked<br>Pi-Pi Stacked<br>Carbon-H bond                                                                                                     |
| <b>3b</b>          | $\alpha$ -Amylase          | -11.4264 | Arg195<br>Arg195<br>Trp62<br>Gln63<br>His305<br>Trp59                  | O (C=O)<br>O (OH)<br>Benzene<br>Benzene<br>CH <sub>3</sub><br>CH <sub>3</sub>                    | Conventional H-bond<br>Conventional H-bond<br>Pi-Pi Stacked<br>Pi-donor H-bond<br>Pi-Alkyl interaction<br>Pi-Alkyl interaction                      |

**Table S9.** Drug-likeness of the most biologically active compounds

| Compound No. | Properties                                                                                                                                                                                                                                                                            | Comment                                      |
|--------------|---------------------------------------------------------------------------------------------------------------------------------------------------------------------------------------------------------------------------------------------------------------------------------------|----------------------------------------------|
| 1a           | <ul style="list-style-type: none"> <li>• Log P = 1.58 (&lt;5)</li> <li>• Molecular weight = 254.08 g/mol (&lt;500)</li> <li>• No of H-bond donor groups (OHs + NHs) = 2 (<math>\leq 5</math>)</li> <li>• No of H-bond acceptor atoms (Os + Ns) = 4 (<math>\leq 10</math>)</li> </ul>  | No violation                                 |
| 1c           | <ul style="list-style-type: none"> <li>• Log P = 0.92 (&lt;5)</li> <li>• Molecular weight = 175.19 g/mol (&lt;500)</li> <li>• No of H-bond donor groups (OHs + NHs) = 2 (<math>\leq 5</math>)</li> <li>• No of H-bond acceptor atoms (Os + Ns) = 4 (<math>\leq 10</math>)</li> </ul>  | No violation                                 |
| 3b           | <ul style="list-style-type: none"> <li>• Log P = 3.05 (&lt;5)</li> <li>• Molecular weight = 386.20 g/mol (&lt;500)</li> <li>• No of H-bond donor groups (OHs + NHs) = 1 (<math>\leq 5</math>)</li> <li>• No of H-bond acceptor atoms (Os + Ns) = 6 (<math>\leq 10</math>)</li> </ul>  | No violation                                 |
| 3c           | <ul style="list-style-type: none"> <li>• Log P = 2.83 (&lt;5)</li> <li>• Molecular weight = 321.33 g/mol (&lt;500)</li> <li>• No of H-bond donor groups (OHs + NHs) = 1 (<math>\leq 5</math>)</li> <li>• No of H-bond acceptor atoms (Os + Ns) = 6 (<math>\leq 10</math>)</li> </ul>  | No violation                                 |
| 3d           | <ul style="list-style-type: none"> <li>• Log P = 2.11 (&lt;5)</li> <li>• Molecular weight = 368.34 g/mol (&lt;500)</li> <li>• No of H-bond donor groups (OHs + NHs) = 1 (<math>\leq 5</math>)</li> <li>• No of H-bond acceptor atoms (Os + Ns) = 9 (<math>\leq 10</math>)</li> </ul>  | No violation                                 |
| 3f           | <ul style="list-style-type: none"> <li>• Log P = 4.32 (&lt;5)</li> <li>• Molecular weight = 388.22 g/mol (&lt;500)</li> <li>• No of H-bond donor groups (OHs + NHs) = 1 (<math>\leq 5</math>)</li> <li>• No of H-bond acceptor atoms (Os + Ns) = 5 (<math>\leq 10</math>)</li> </ul>  | No violation                                 |
| 3g           | <ul style="list-style-type: none"> <li>• Log P = 2.94 (&lt;5)</li> <li>• Molecular weight = 388.22 g/mol (&lt;500)</li> <li>• No of H-bond donor groups (OHs + NHs) = 1 (<math>\leq 5</math>)</li> <li>• No of H-bond acceptor atoms (Os + Ns) = 5 (<math>\leq 10</math>)</li> </ul>  | No violation                                 |
| 5            | <ul style="list-style-type: none"> <li>• Log P = 5.09 (&gt;5)</li> <li>• Molecular weight = 512.78 g/mol (&gt; 500)</li> <li>• No of H-bond donor groups (OHs + NHs) = 0 (<math>\leq 5</math>)</li> <li>• No of H-bond acceptor atoms (Os + Ns) = 6 (<math>\leq 10</math>)</li> </ul> | Two violations in log P and molecular weight |
| 8            | <ul style="list-style-type: none"> <li>• Log P = 1.92 (&lt;5)</li> <li>• Molecular weight = 308.74 g/mol (&lt;500)</li> <li>• No of H-bond donor groups (OHs + NHs) = 1 (<math>\leq 5</math>)</li> <li>• No of H-bond acceptor atoms (Os + Ns) = 6 (<math>\leq 10</math>)</li> </ul>  | No violation                                 |
| 10           | <ul style="list-style-type: none"> <li>• Log P = 3.39 (&lt;5)</li> <li>• Molecular weight = 469.52 g/mol (&lt;500)</li> <li>• No of H-bond donor groups (OHs + NHs) = 1 (<math>\leq 5</math>)</li> <li>• No of H-bond acceptor atoms (Os + Ns) = 8 (<math>\leq 10</math>)</li> </ul>  | No violation                                 |
| 12           | <ul style="list-style-type: none"> <li>• Log P = 2.35 (&lt;5)</li> <li>• Molecular weight = 432.86 g/mol (&lt;500)</li> <li>• No of H-bond donor groups (OHs + NHs) = 2 (<math>\leq 5</math>)</li> <li>• No of H-bond acceptor atoms (Os + Ns) = 9 (<math>\leq 10</math>)</li> </ul>  | No violation                                 |



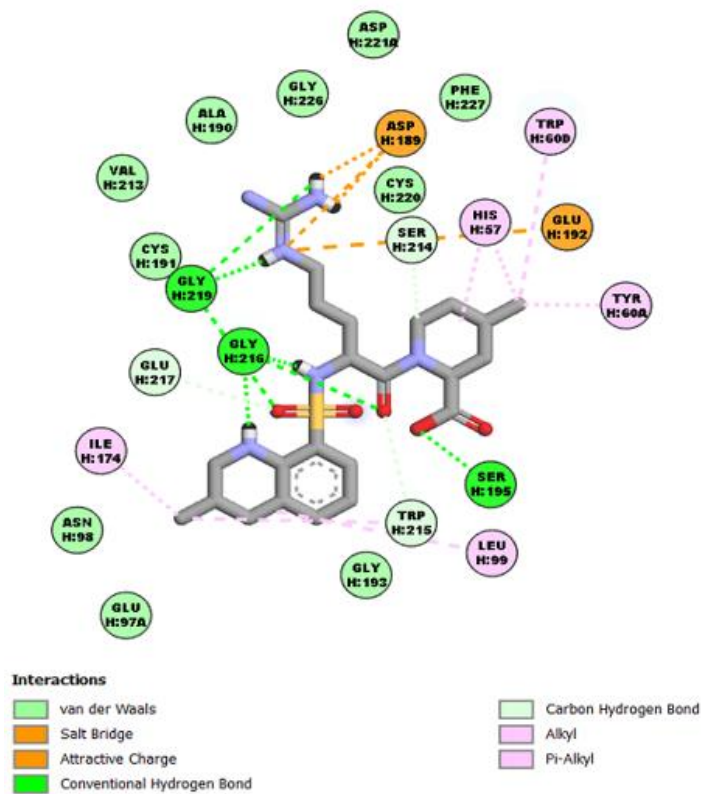

**Figure S1.** The 2D representation of the interactions of **MIT** within **THR** active site

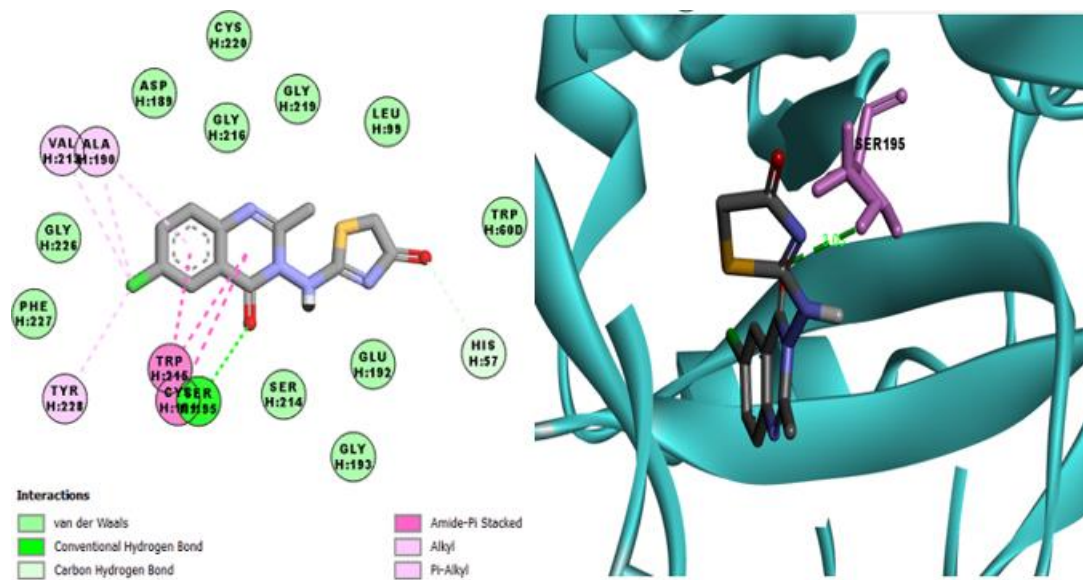

**Figure S2.** The 2D & 3D representations of the interactions of compound **8** within **Thrombin** active site

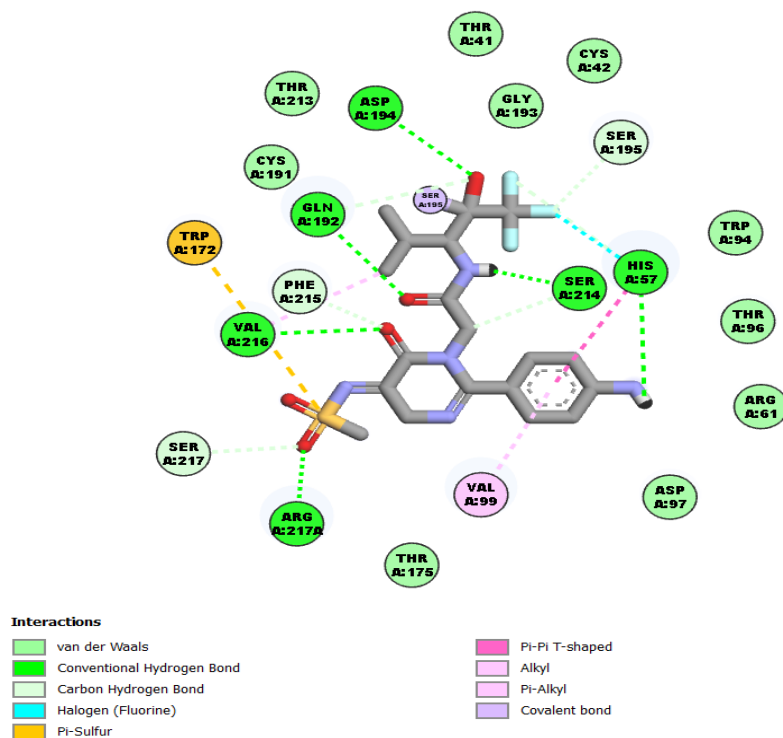

**Figure S3.** The 2D representation of the interactions of **TFI** within **Elastase** active site

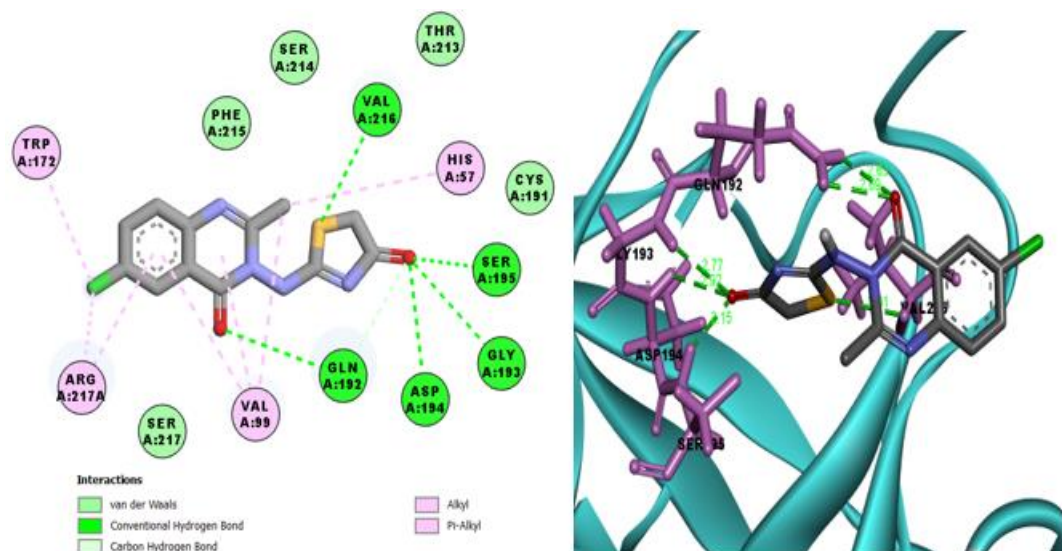

**Figure S4.** The 2D & 3D representations of the interactions of **compound 8** within **Elastase** active site

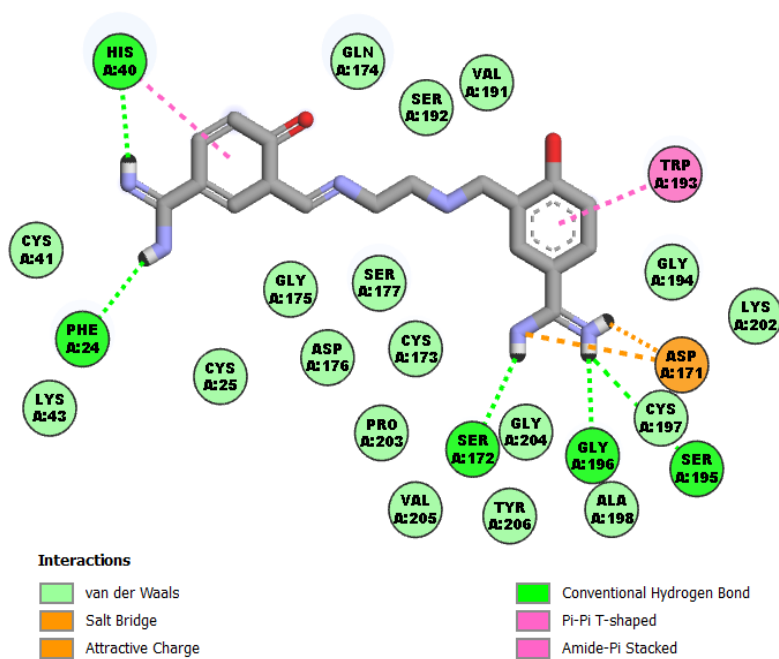

**Figure S5.** The 2D representations of the interactions of A2C within **Trypsin** active site

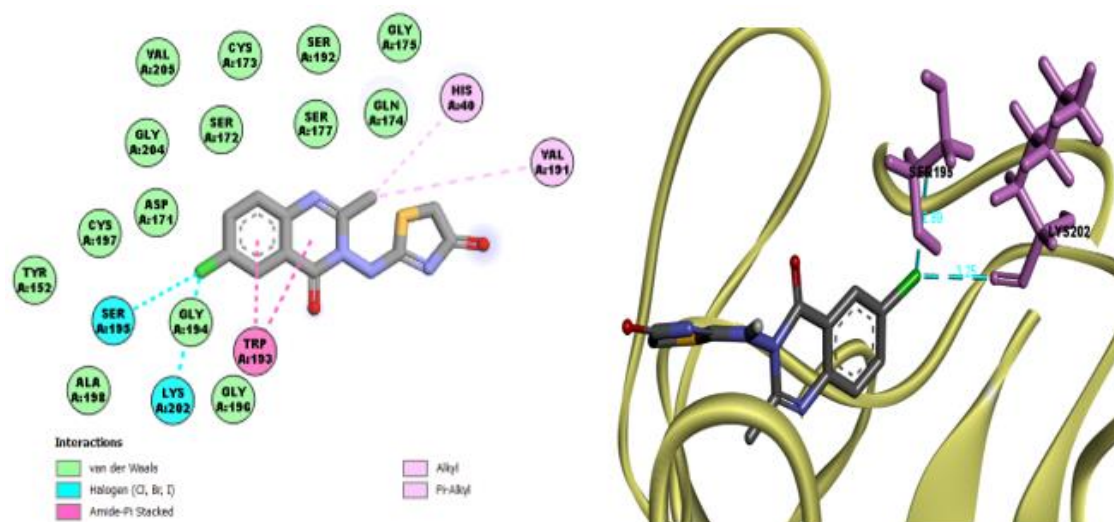

**Figure S6.** The 2D & 3D representations of the interactions of compound **8** within **Trypsin** active site

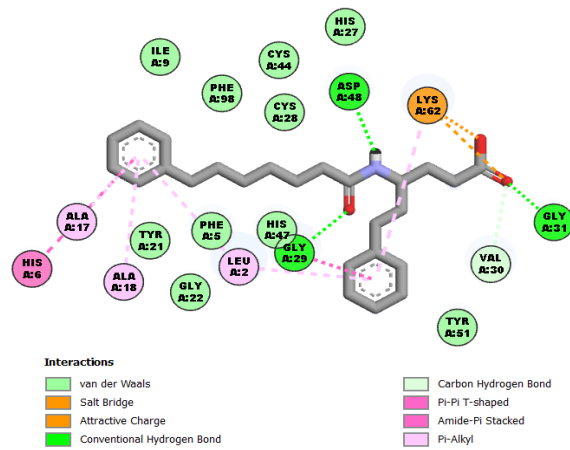

**Figure S7.** The 2D representation of the interactions of **BR4** within **hsPLA<sub>2</sub>-G-IIA** active site

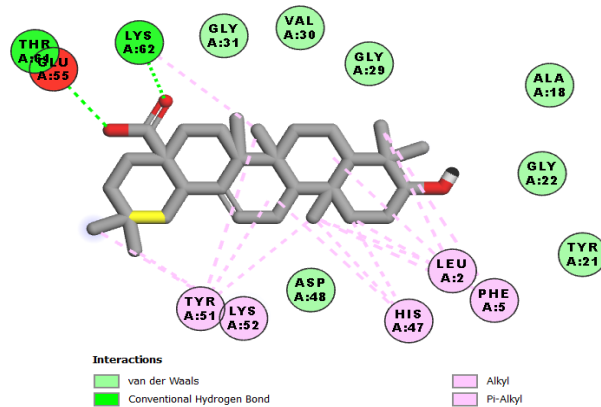

**Figure S8.** The 2D representation of the interactions of **Oleanolic acid** within **hsPLA<sub>2</sub>-G-IIA** active site

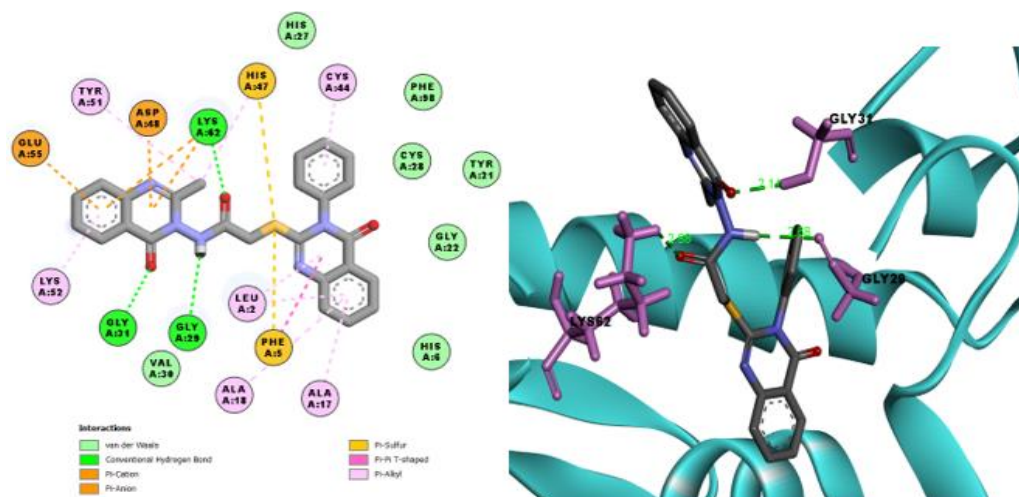

**Figure S9.** The 2D & 3D representations of the interactions of compound **10** within **hsPLA<sub>2</sub>-G-IIA** active site

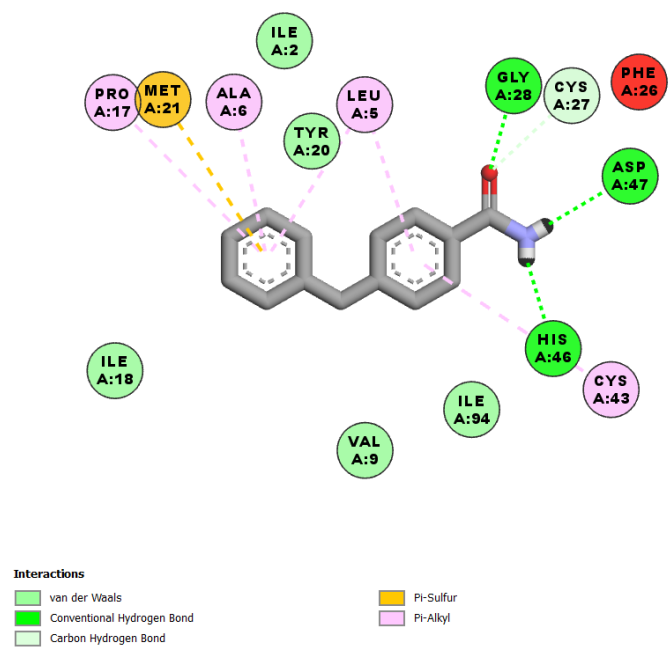

**Figure S10.** The 2D representation of the interactions of **9JH** within **hsPLA<sub>2</sub>-G-X** active site

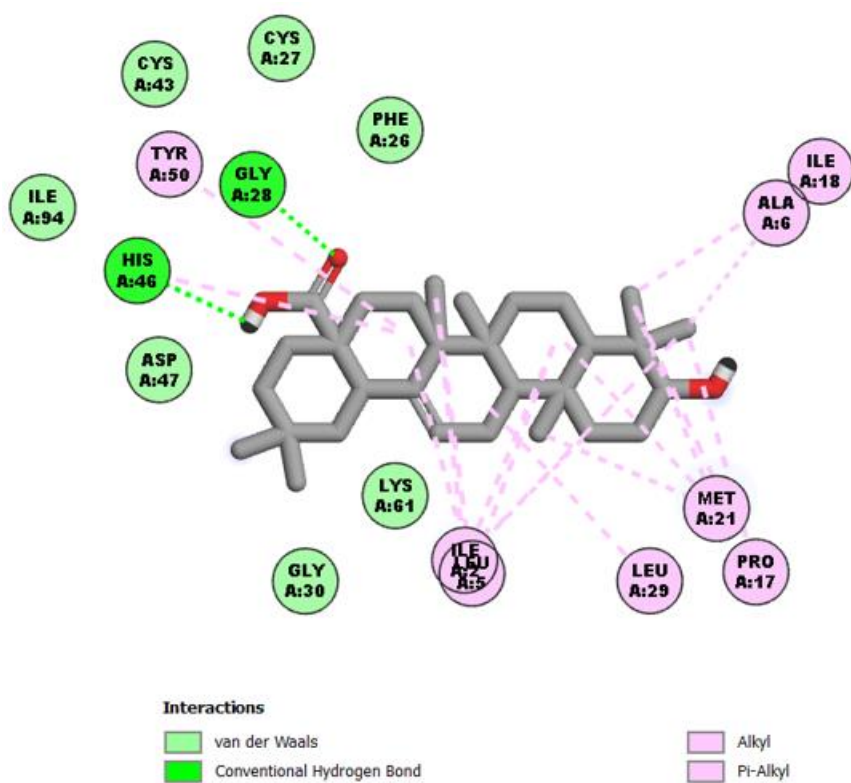

**Figure S11.** The 2D & 3D representations of the interactions of **Oleanolic acid** within **hsPLA<sub>2</sub>-G-X** active site



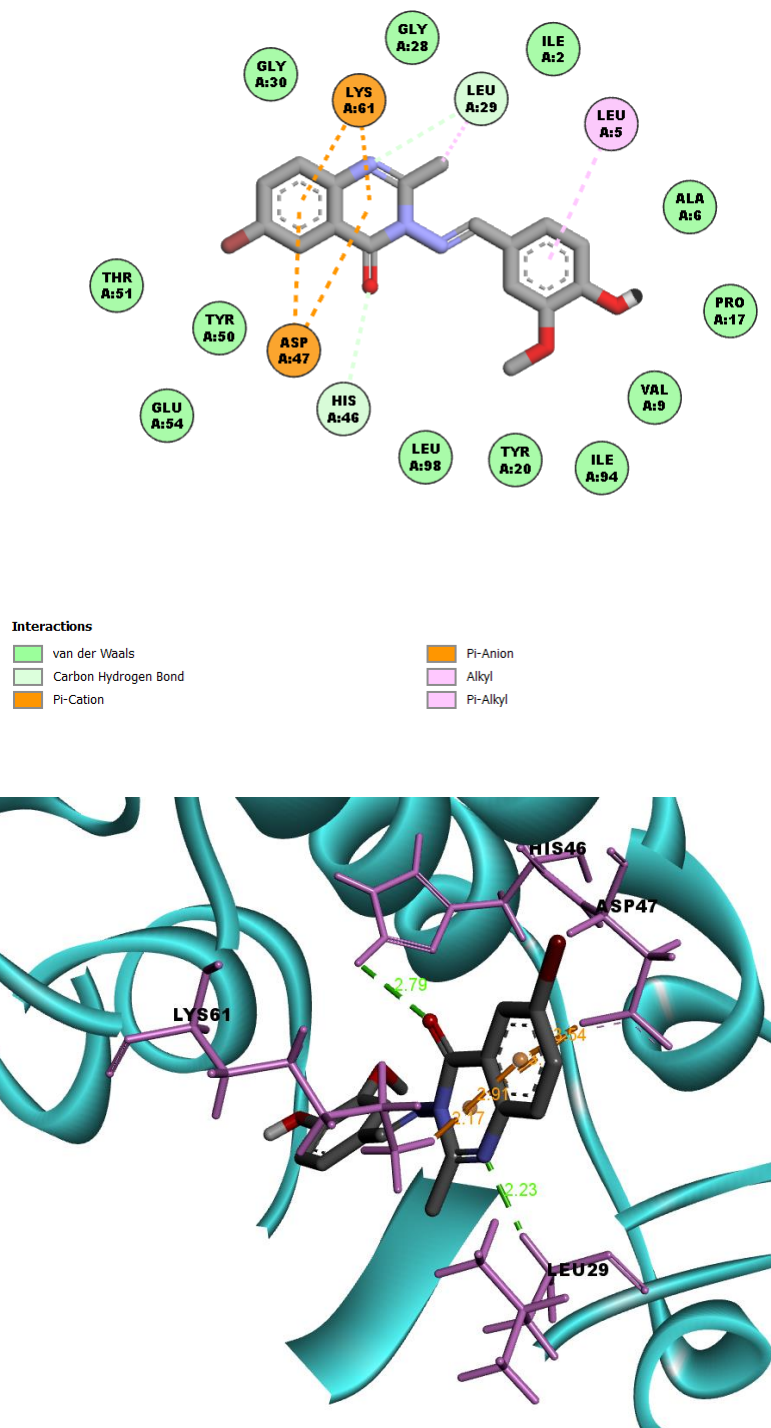

**Figure S12.** The 2D & 3D representations of the interactions of compound **3g** within **hsPLA<sub>2</sub>-G-X** active site

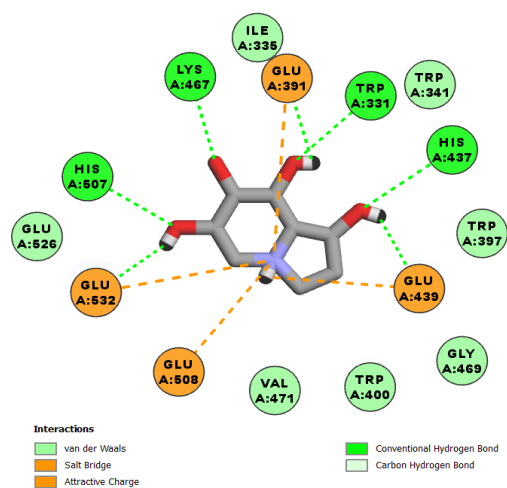

**Figure S13.** The 2D representation of the interactions of **CTS** within  $\alpha$ -Glucosidase active site

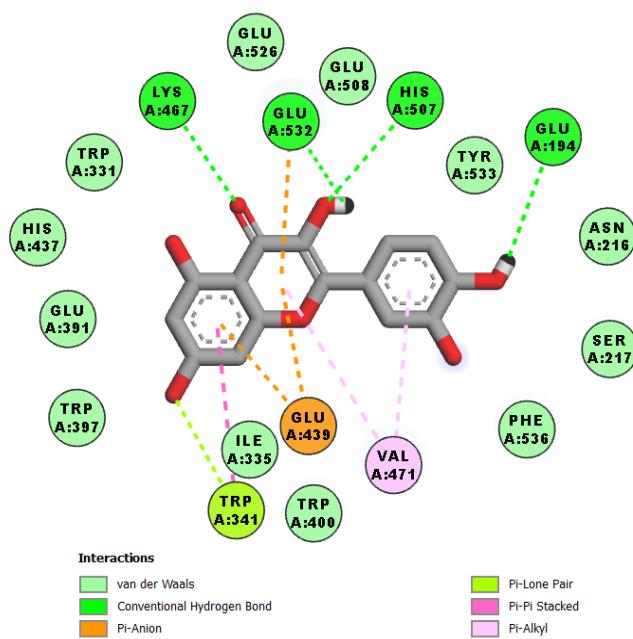

**Figure S14.** The 2D representation of the interaction of the **Quercetin** within  $\alpha$ -Glucosidase active site

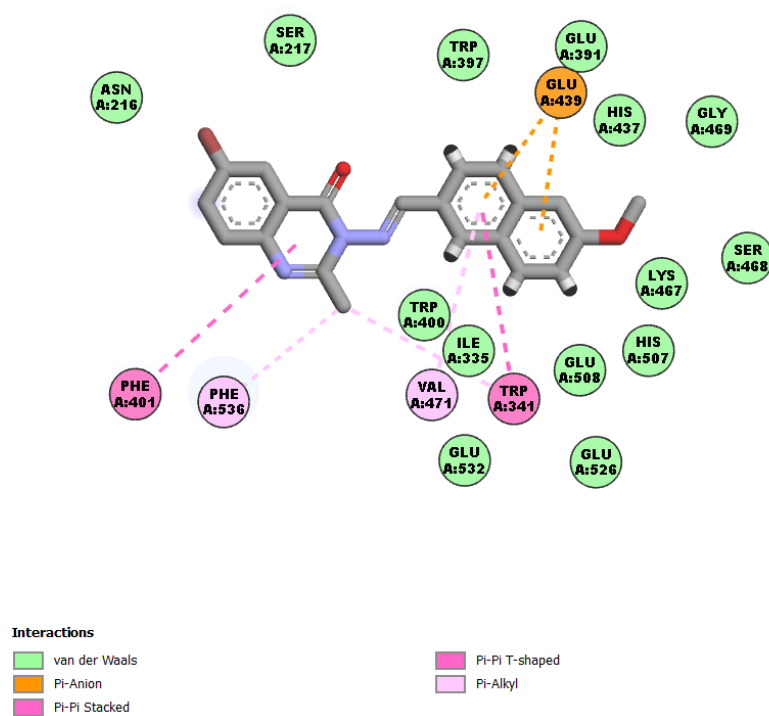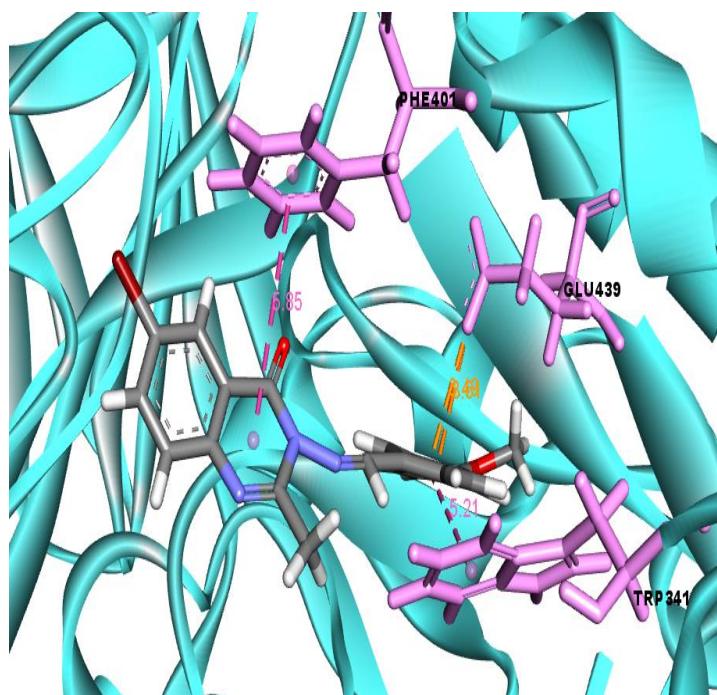

**Figure S15.** The 2D & 3D representations of the interactions of compound **3f** within  $\alpha$ -Glucosidase active site



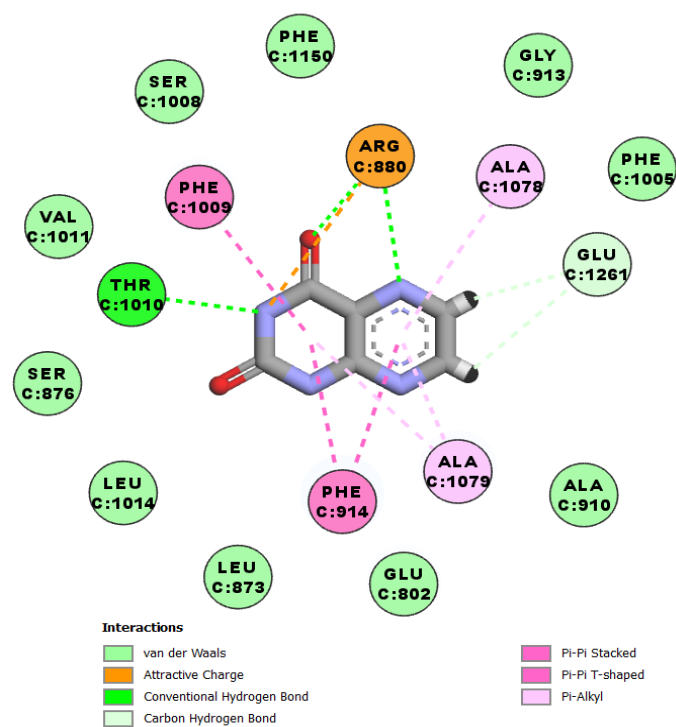

**Figure S16.** The 2D representation of the interactions of **LUZ** within **Xanthine oxidoreductase** active site

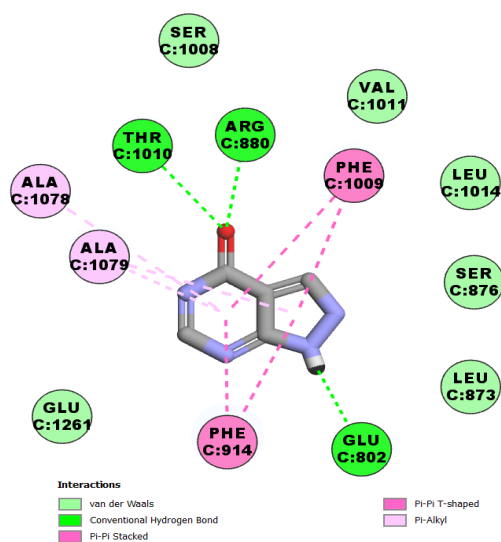

**Figure S17.** The 2D representations of the interactions of **Allopurinol** within **Xanthine oxidoreductase** active site

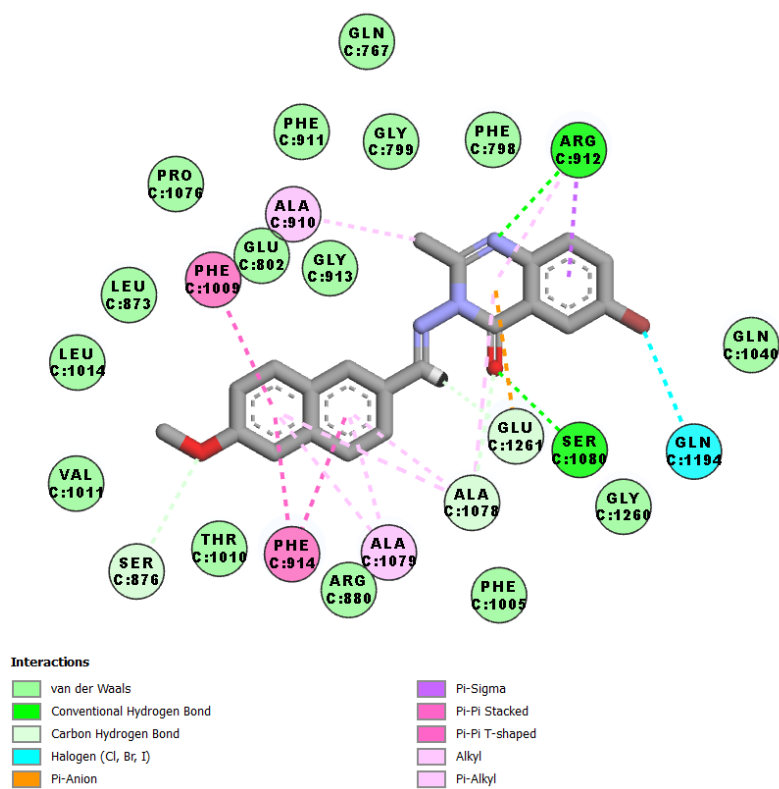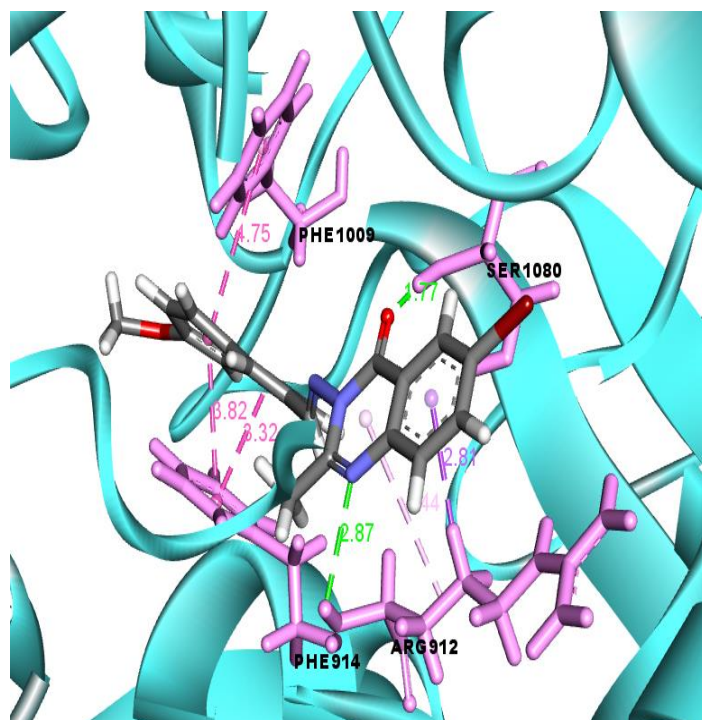

**Figure S18.** The 2D & 3D representations of the interactions of compound **3f** within Xanthine oxidoreductase active site

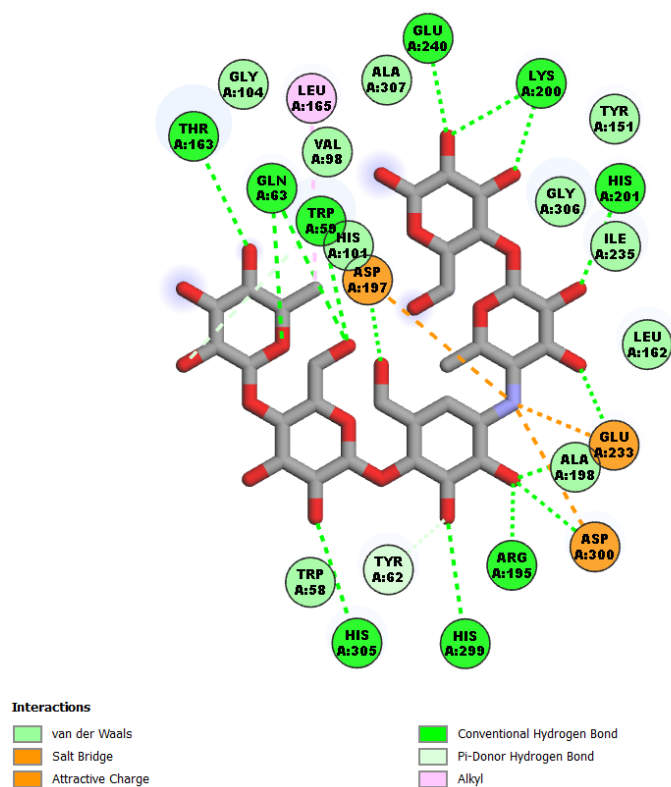

**Figure S19.** The 2D representations of the interactions of **AC1** within  $\alpha$ -Amylase active site

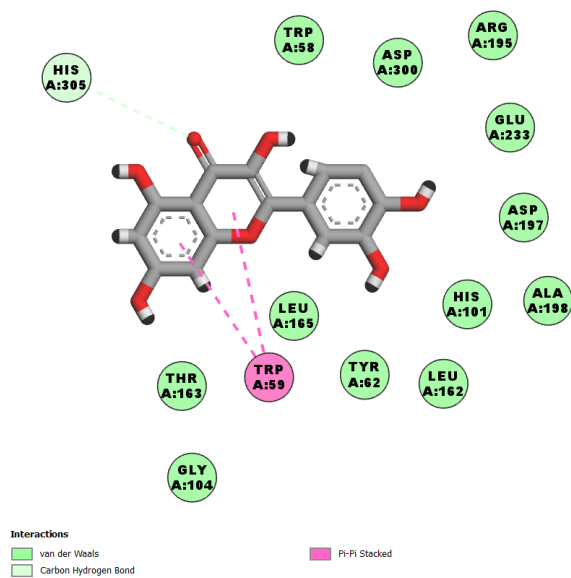

**Figure S20.** The 2D representations of the interactions of **Quercetin** within  $\alpha$ -Amylase active site

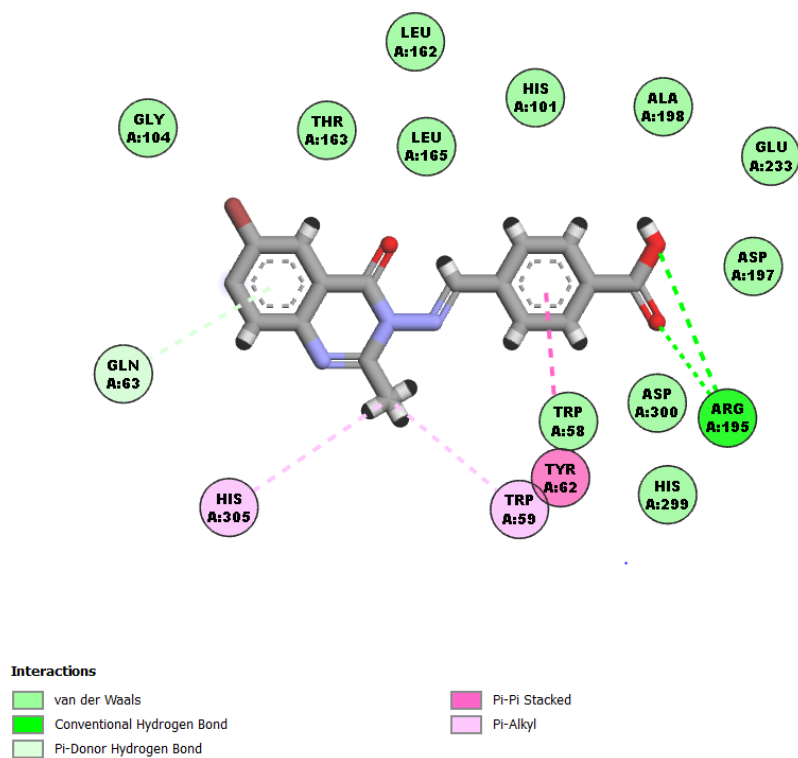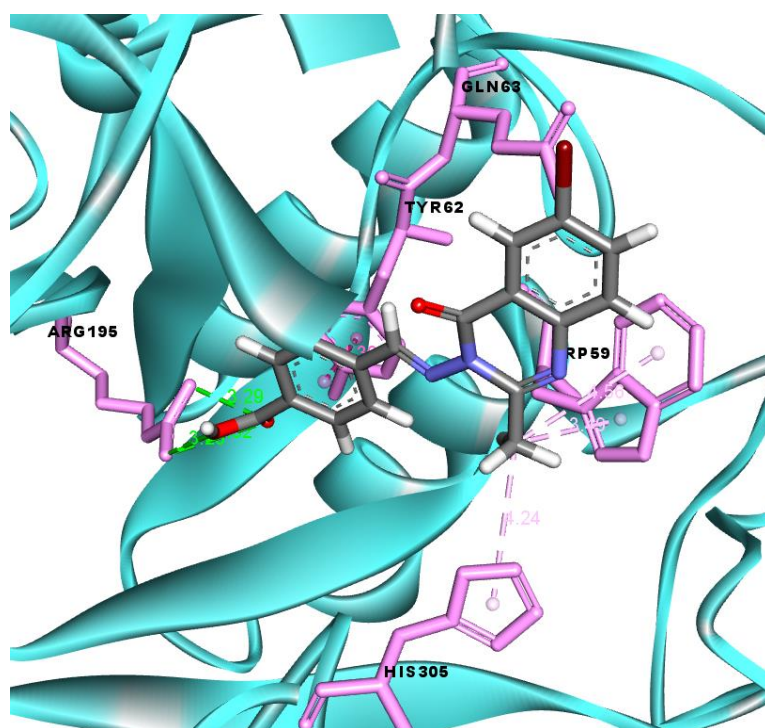

**Figure S21.** The 2D & 3D representations of the interactions of compound **3b** within  $\alpha$ -Amylase active site

## <sup>1</sup>H and <sup>13</sup>C NMR spectra of selected compounds

### Compound 3a

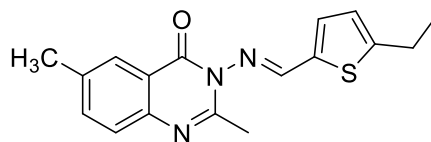

### <sup>1</sup>H-NMR (500 MHz; CDCl<sub>3</sub>) of compound 3a

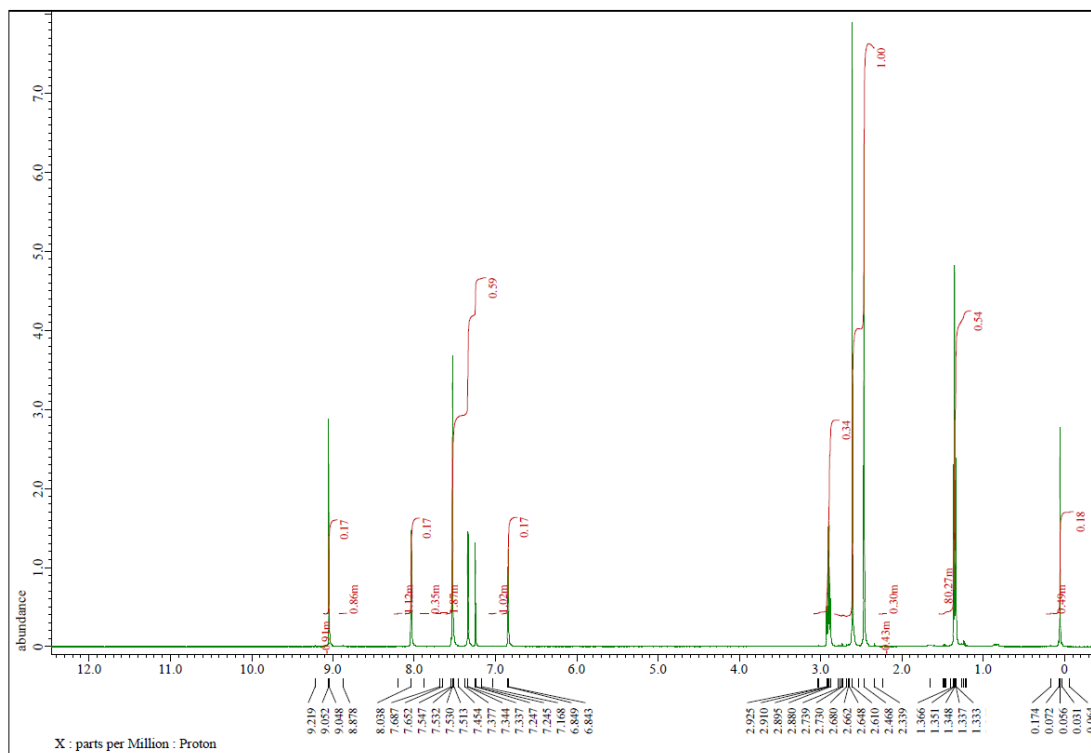

### Expanded $^1\text{H-NMR}$ (500 MHz; $\text{CDCl}_3$ ) of compound 3a

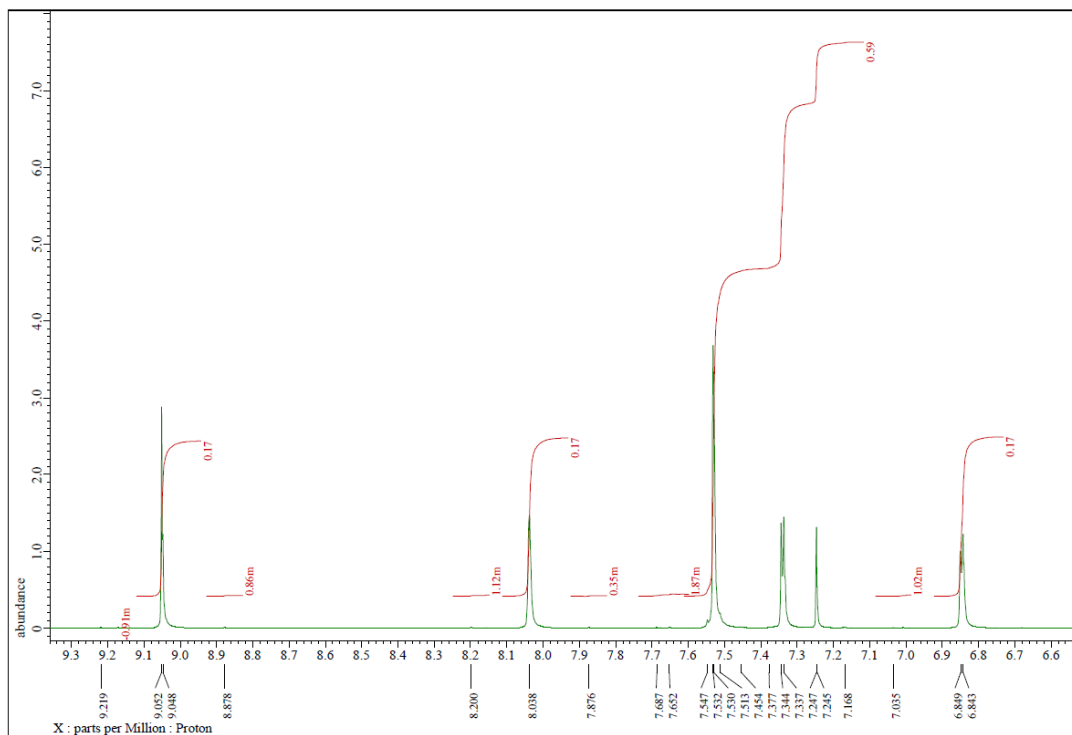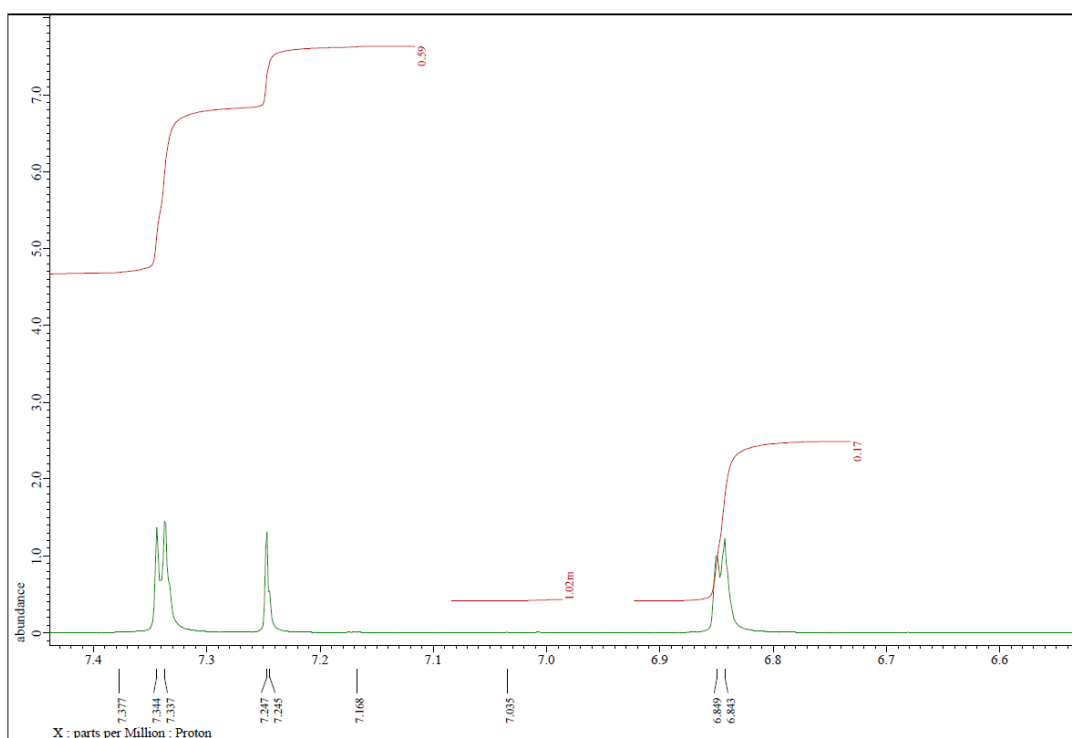

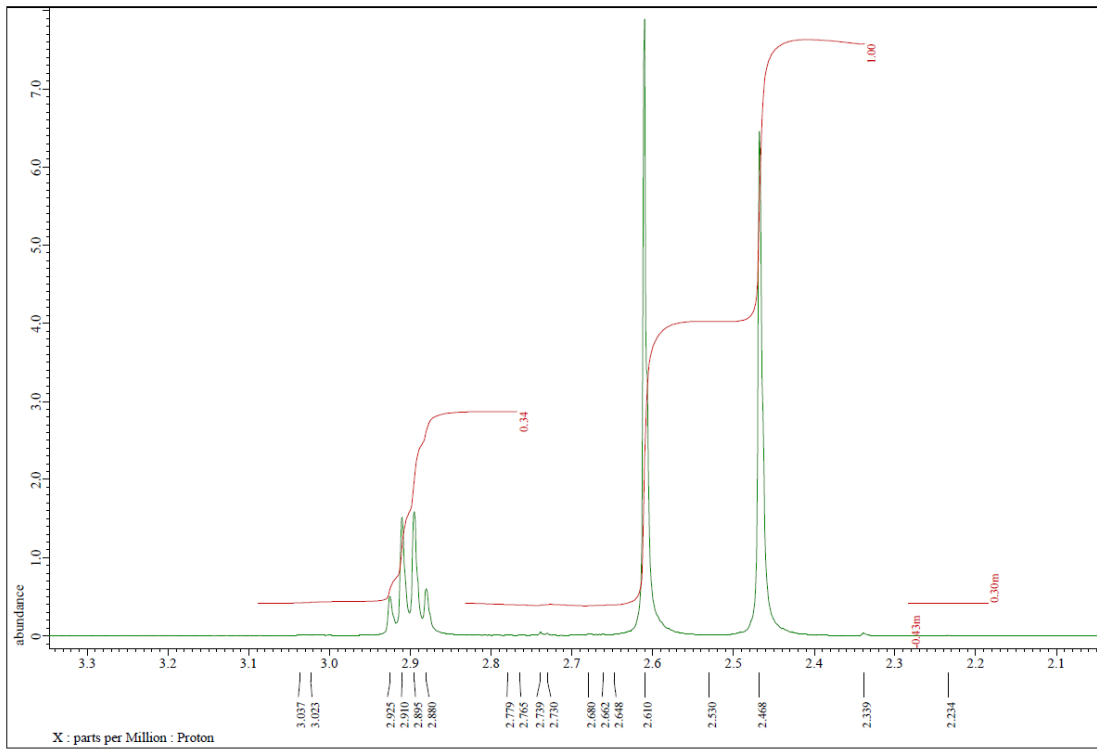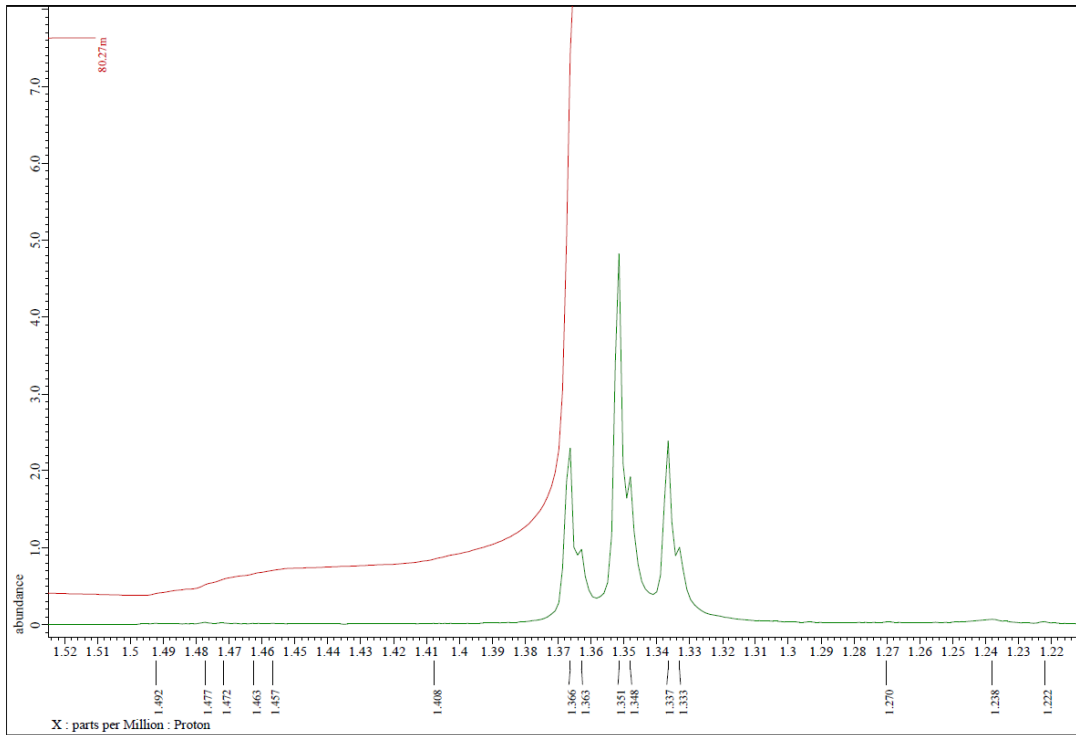

**$^{13}\text{C}$ -NMR (150 MHz;  $\text{CDCl}_3$ ) of compound 3a**

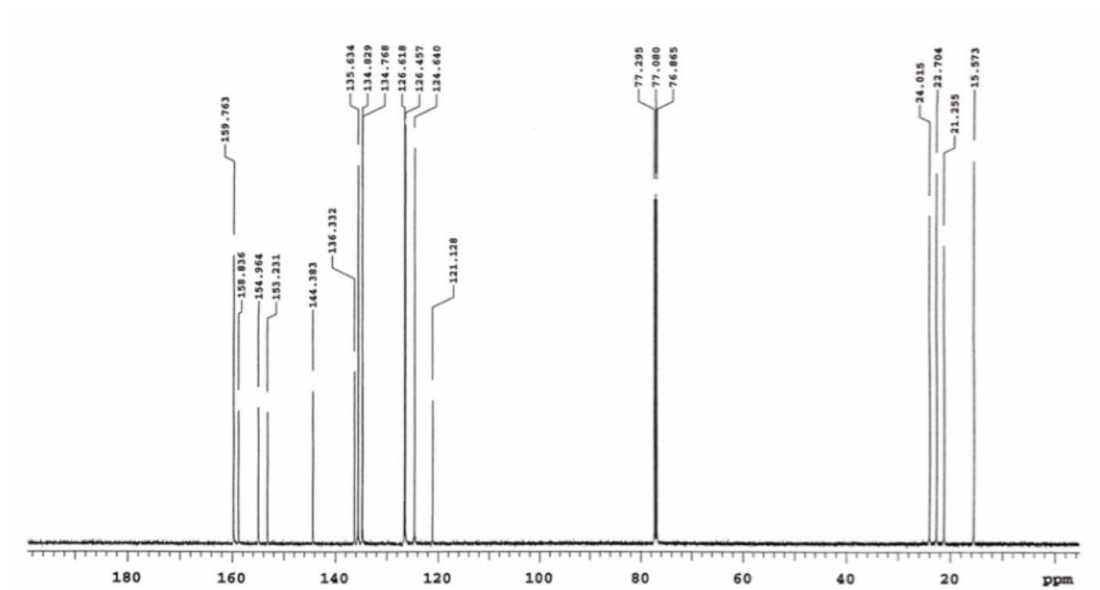



### Compound 3e

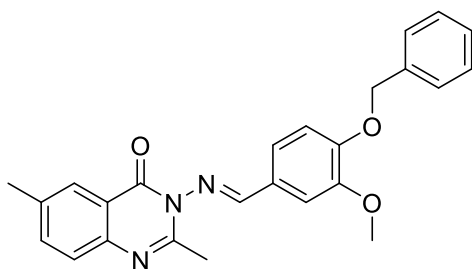

### <sup>1</sup>H-NMR (500 MHz; CDCl<sub>3</sub>) of compound 3e

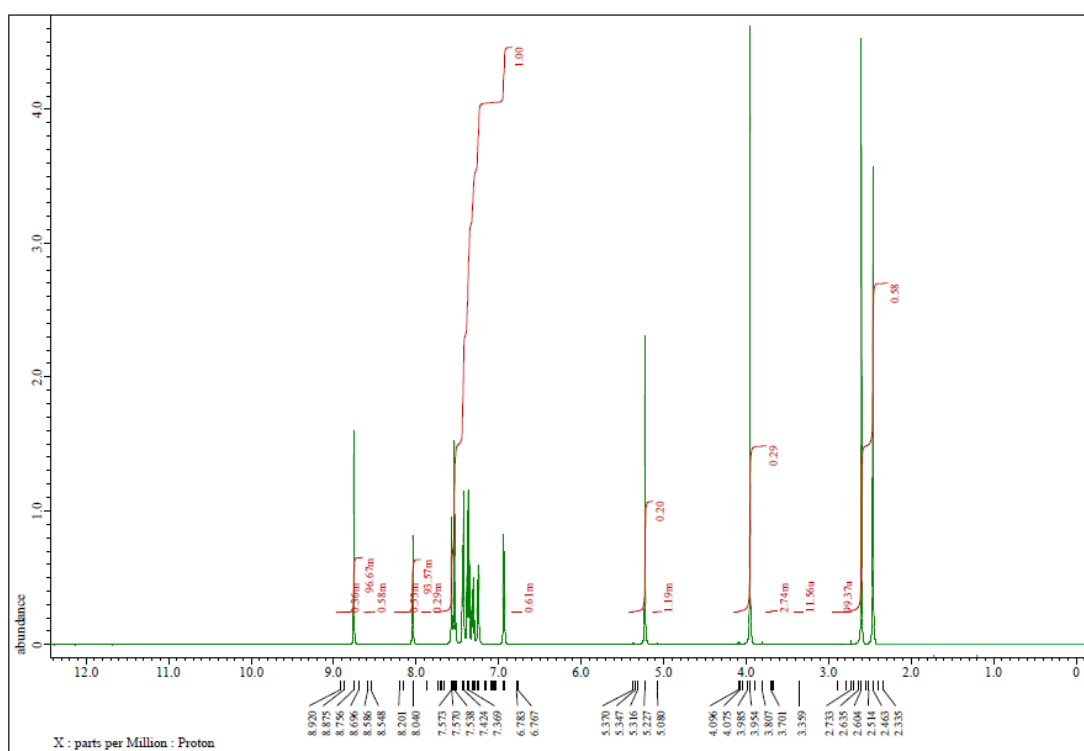

## Expanded $^1\text{H-NMR}$ (500 MHz; $\text{CDCl}_3$ ) of compound 3e

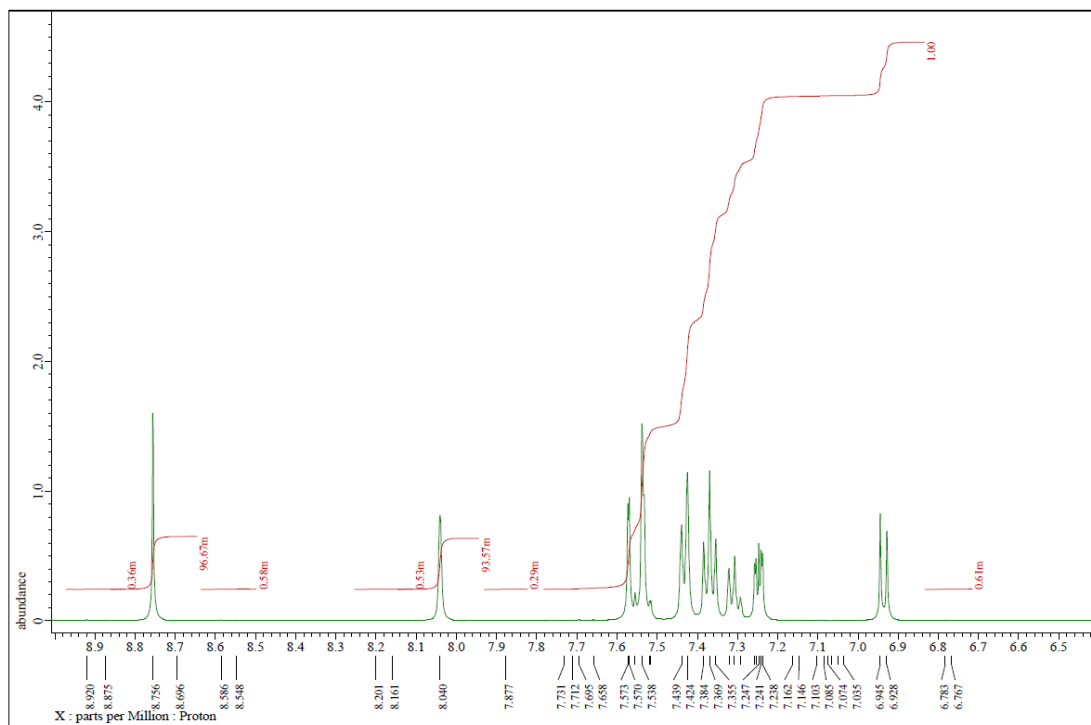

**$^{13}\text{C}$ -NMR (125 MHz;  $\text{CDCl}_3$ ) of compound 3e**

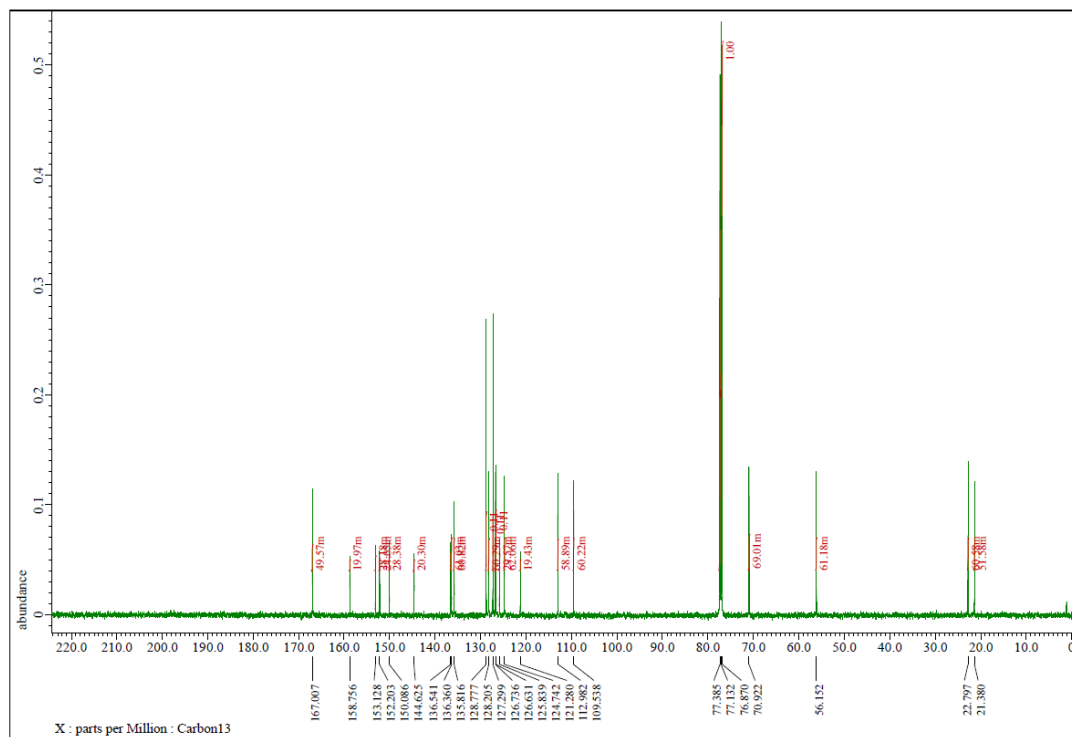

### Compound 3g

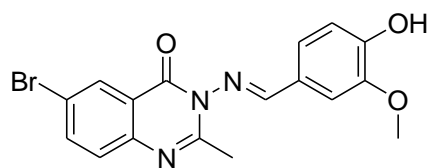

### <sup>1</sup>H-NMR (600 MHz; DMSO-*d*<sub>6</sub>) of compound 3g

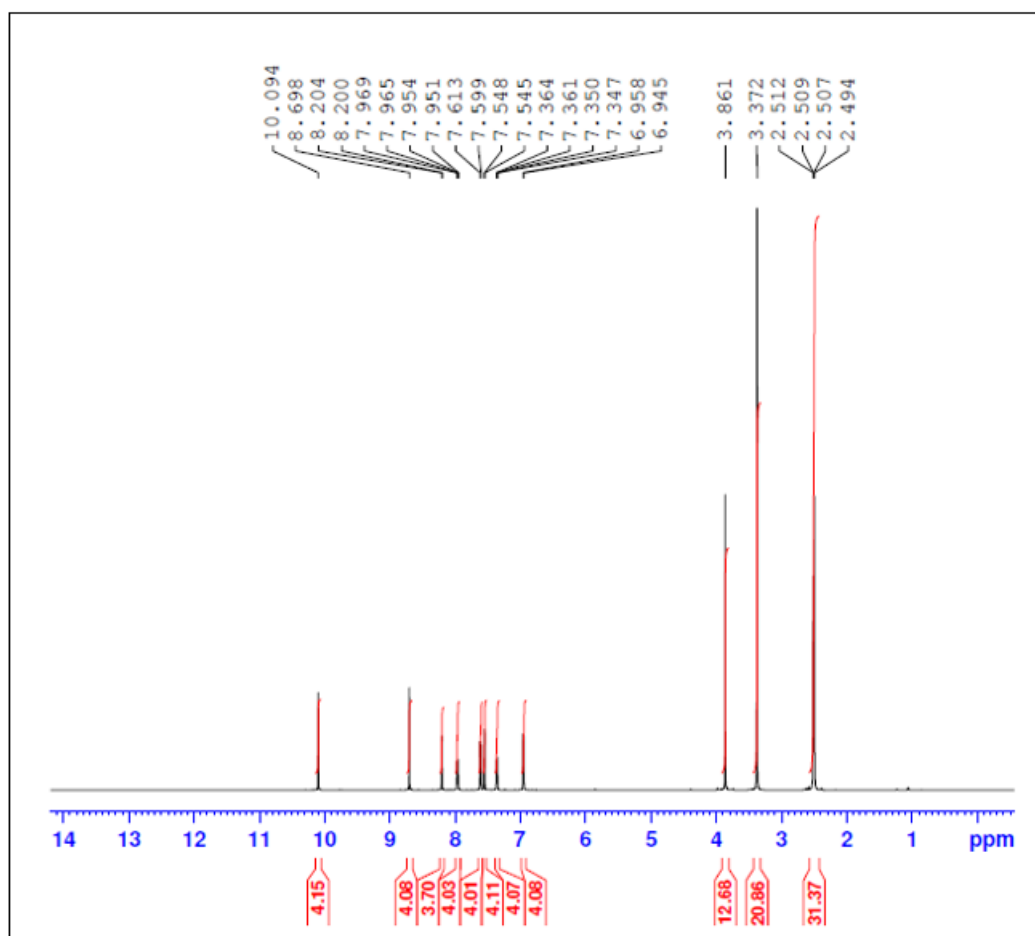

Expanded <sup>1</sup>H-NMR spectrum (600 MHz; DMSO-*d*<sub>6</sub>) of compound 3g

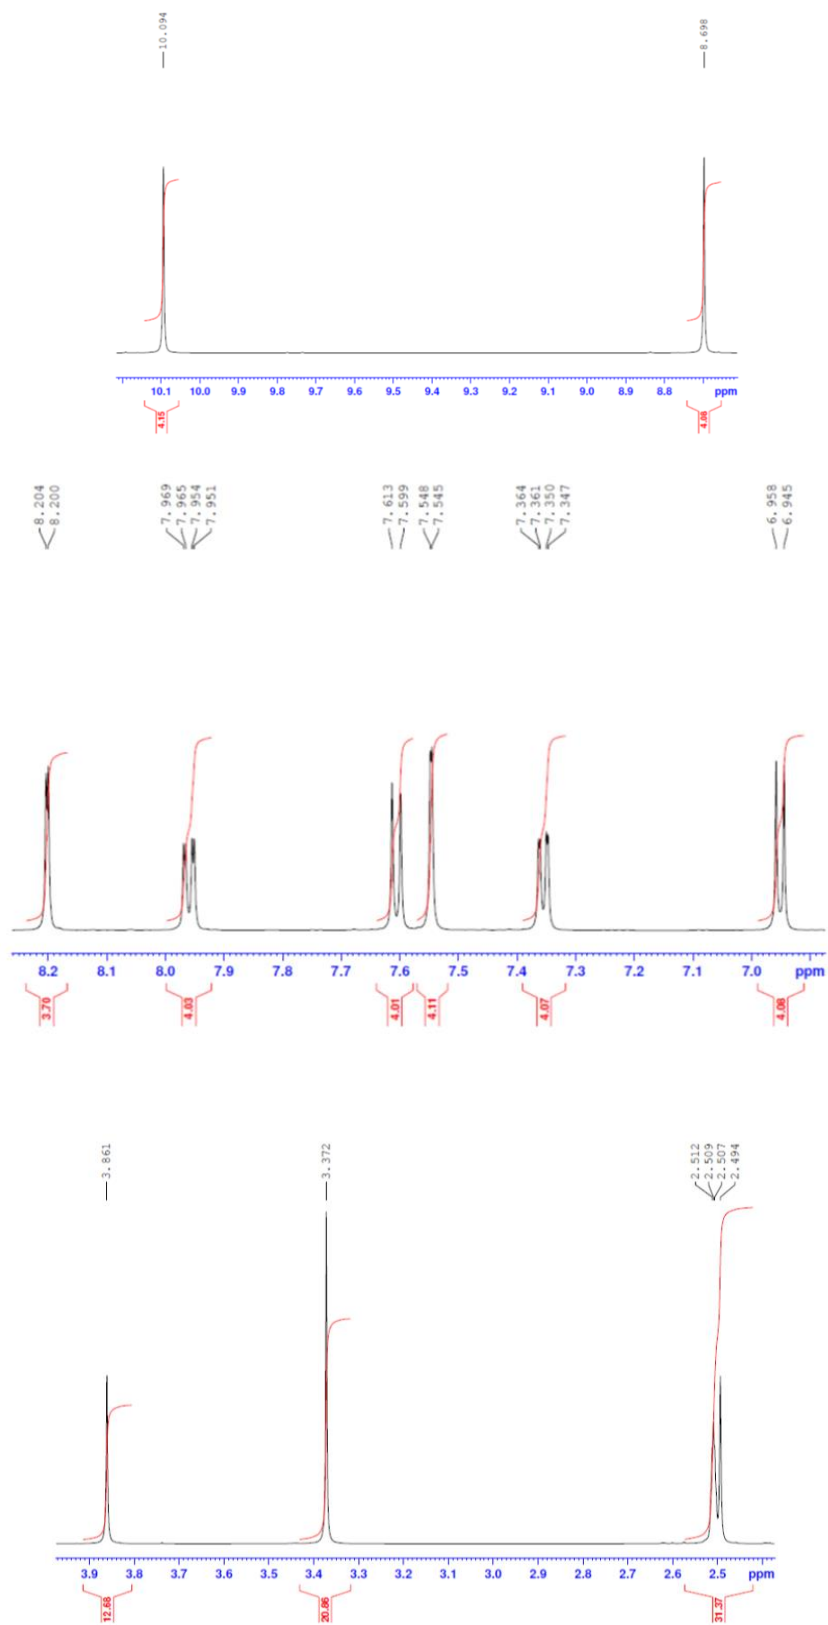

**<sup>13</sup>C-NMR (150 MHz; DMSO-*d*<sub>6</sub>) of compound 3g**

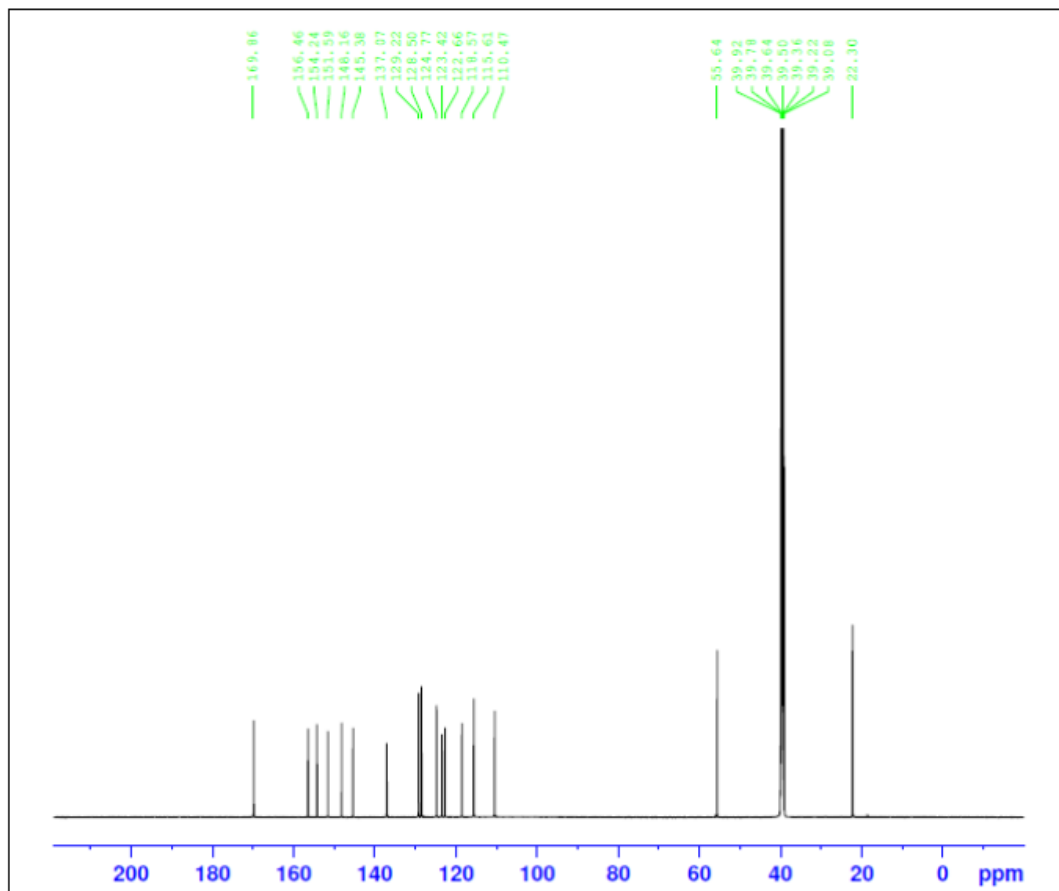

Expanded  $^{13}\text{C}$ -NMR (150 MHz;  $\text{DMSO-}d_6$ ) of compound 3g

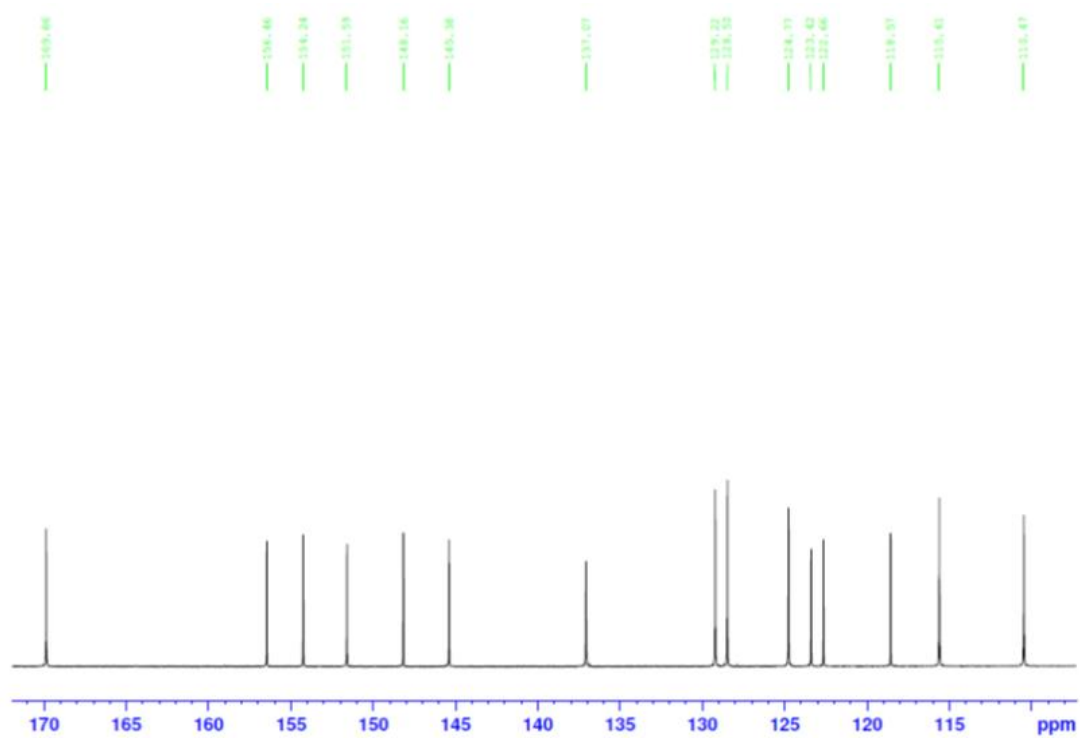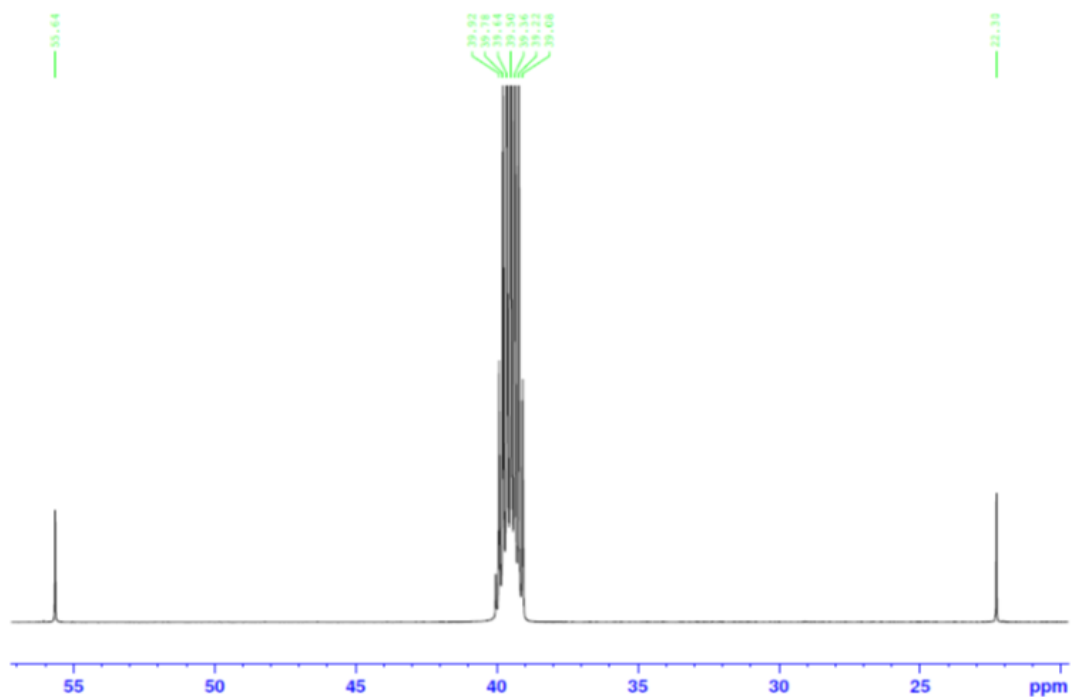

### Compound 5

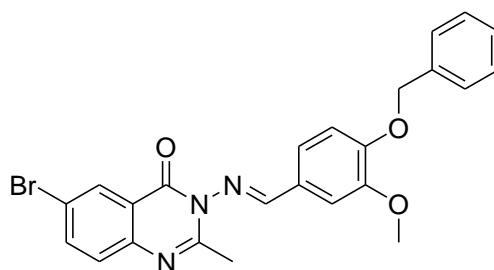

### <sup>1</sup>H-NMR (850 MHz; CDCl<sub>3</sub>) of compound 5

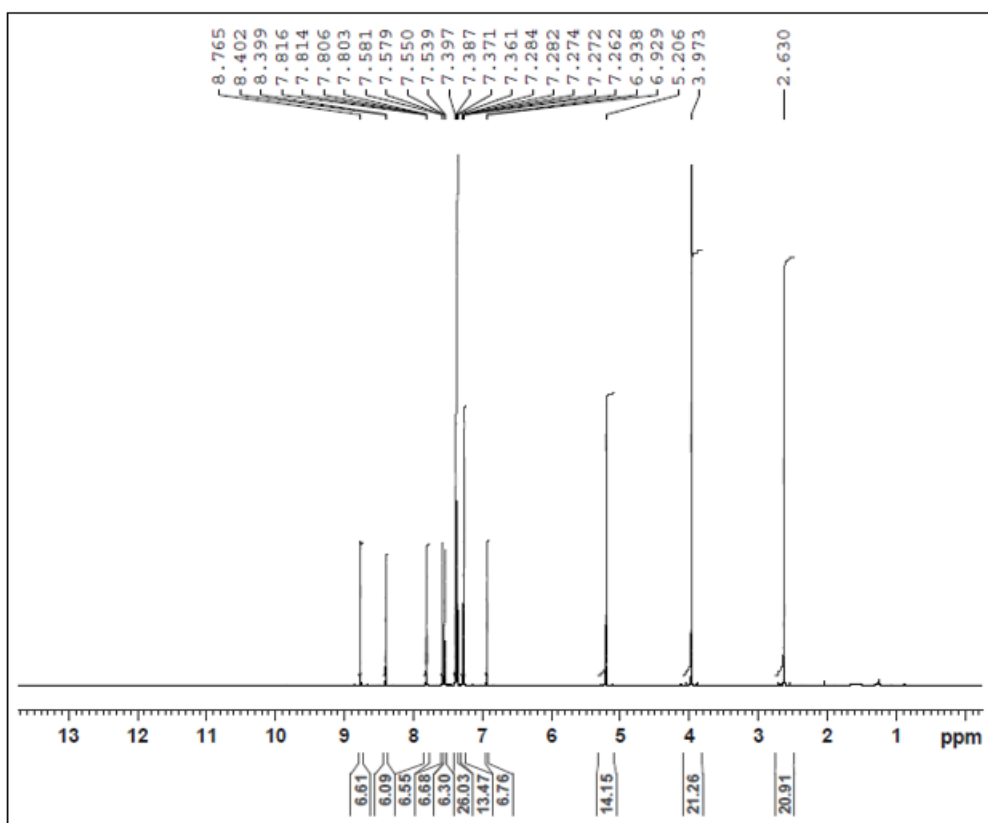



Expanded  $^1\text{H-NMR}$  (850 MHz;  $\text{CDCl}_3$ ) of compound 5

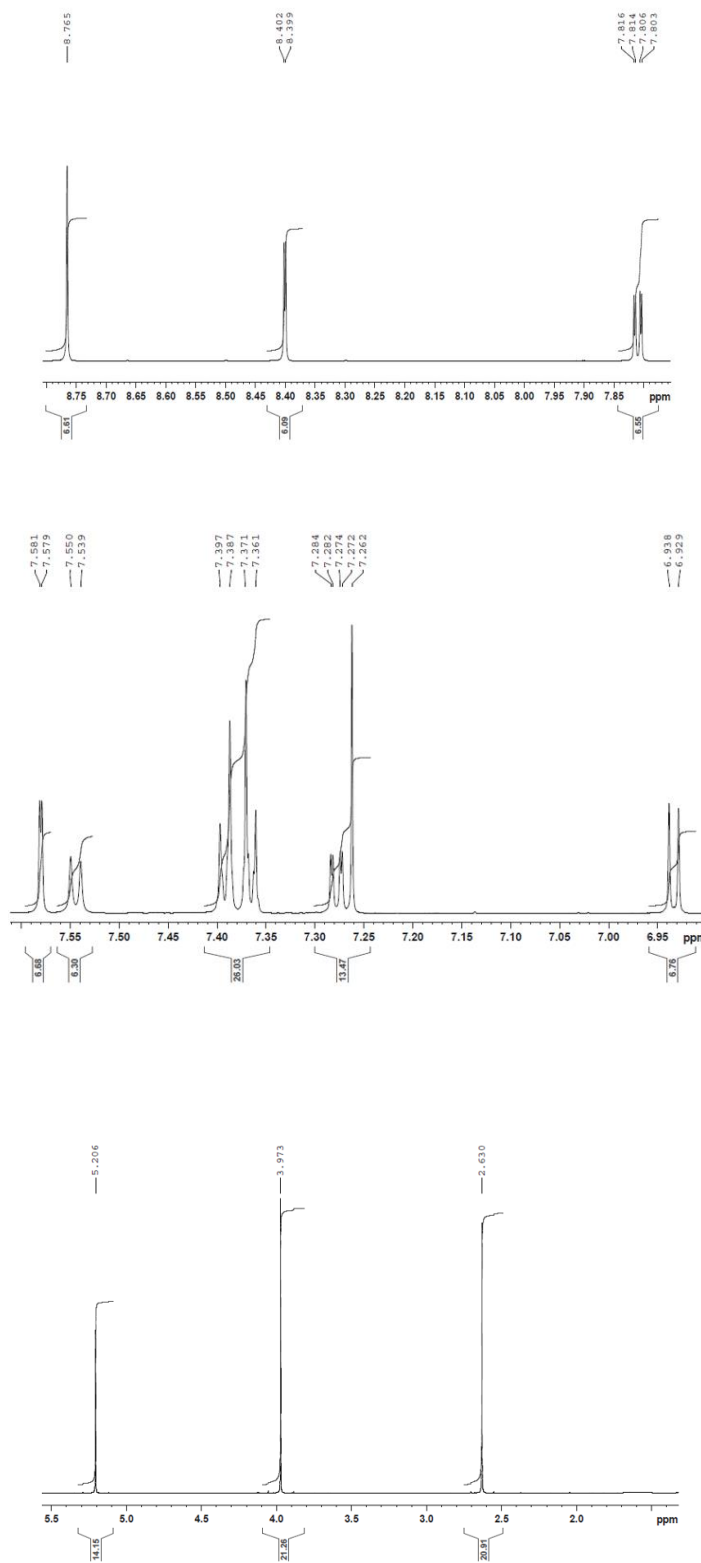

**<sup>13</sup>C-NMR (213 MHz; CDCl<sub>3</sub>) of compound 5**

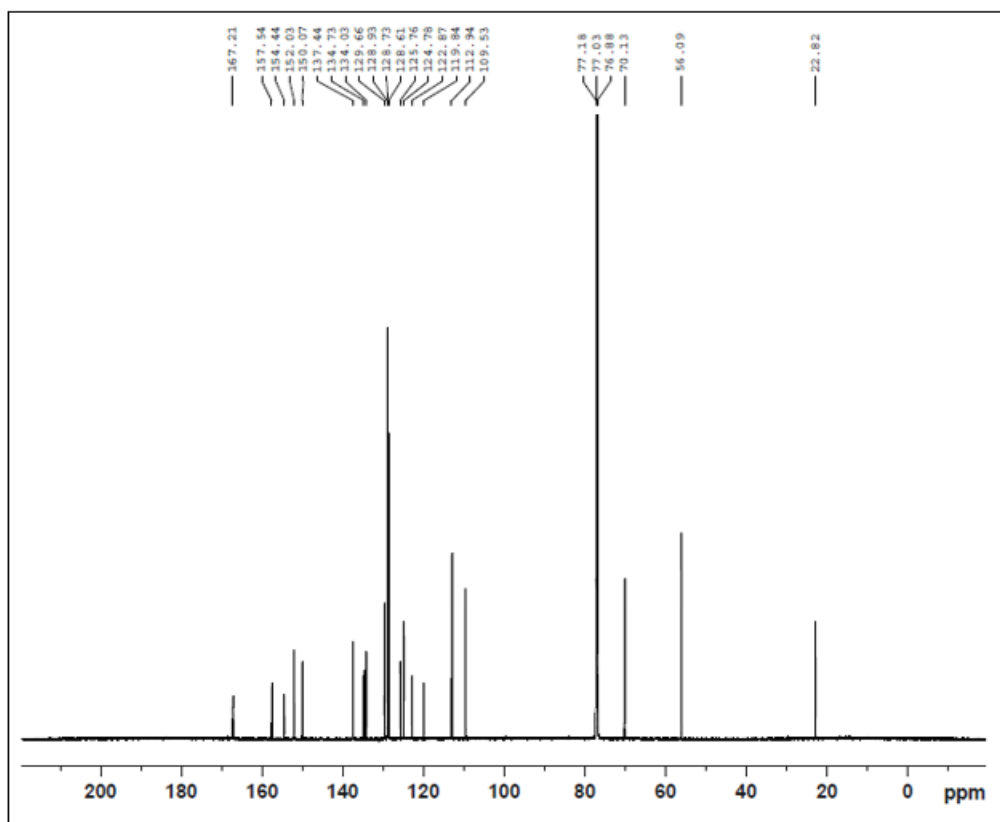

Expanded  $^{13}\text{C}$ -NMR (213 MHz;  $\text{CDCl}_3$ ) of compound 5

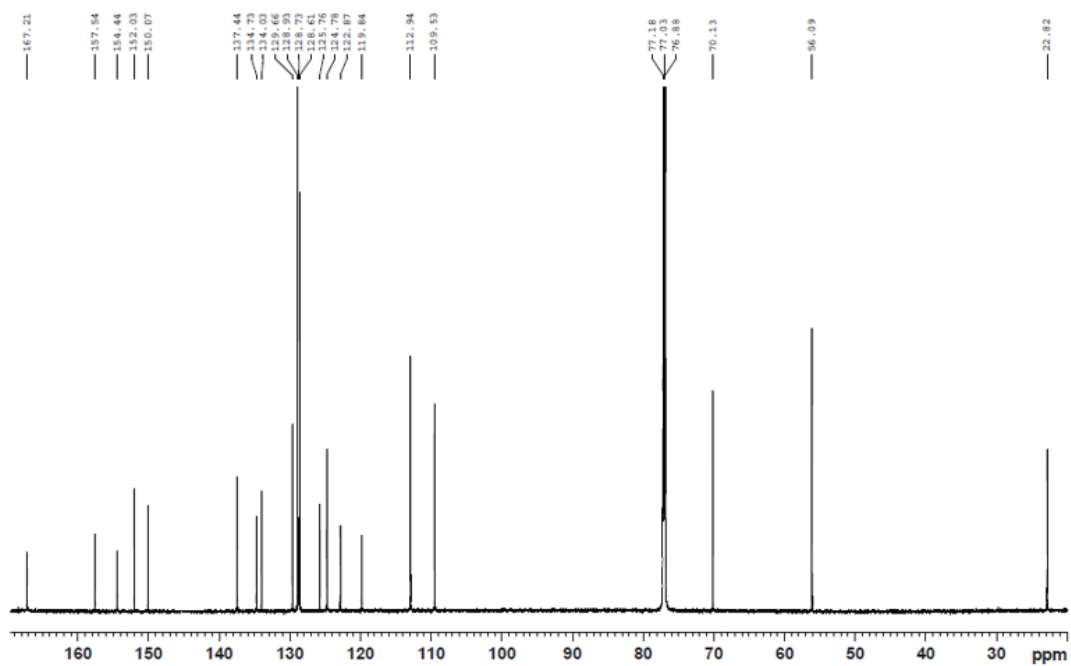

### Compound 8

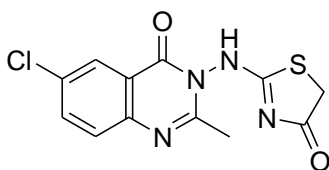

### <sup>1</sup>H-NMR (850 MHz; CDCl<sub>3</sub>) of compound 8

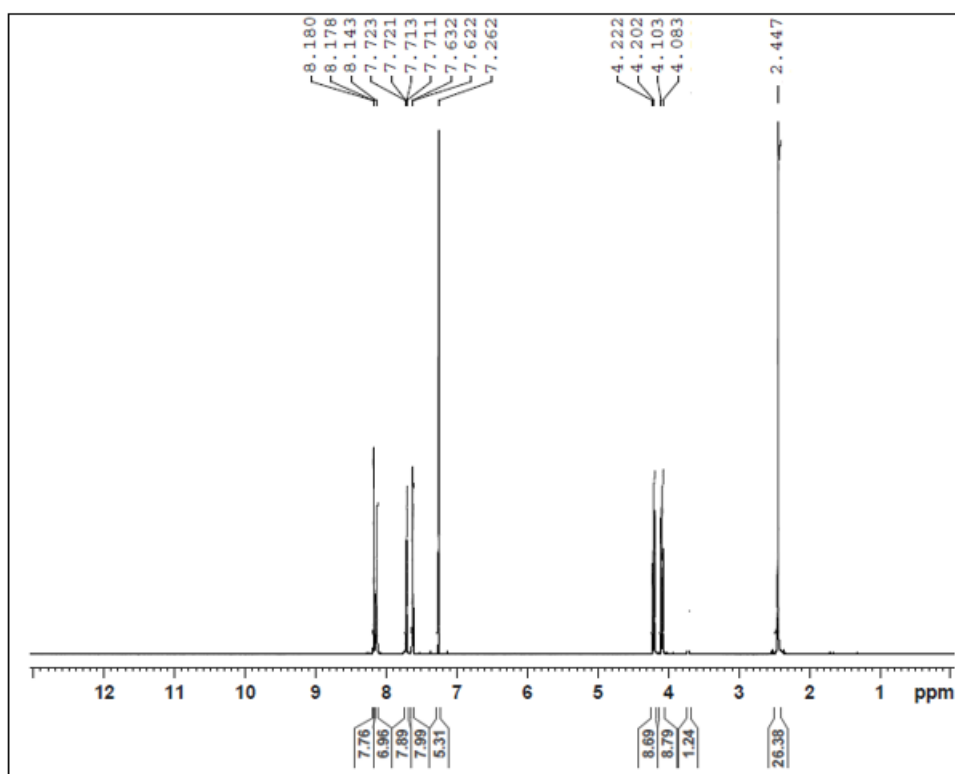

**Expanded  $^1\text{H-NMR}$  (850 MHz;  $\text{CDCl}_3$ ) of compound 8**

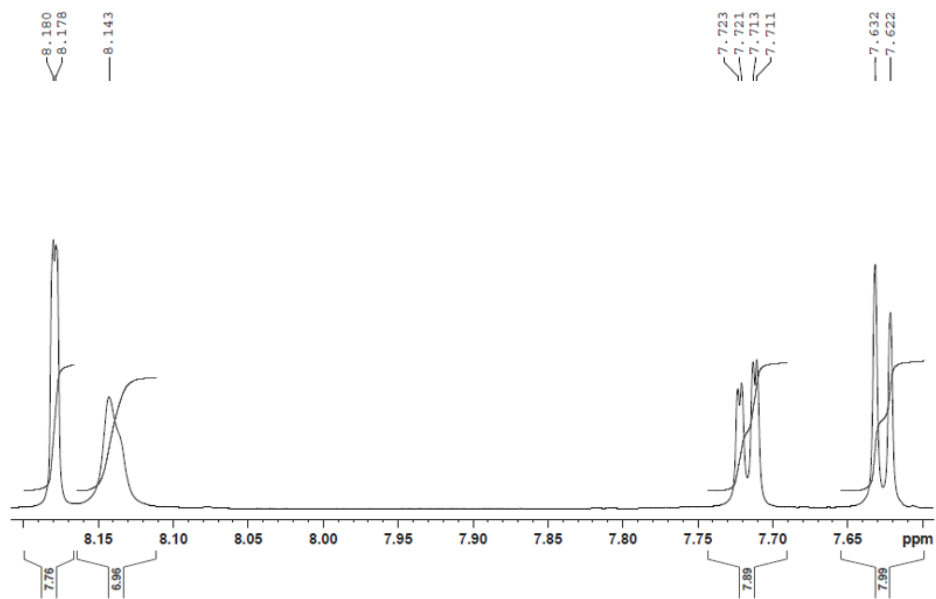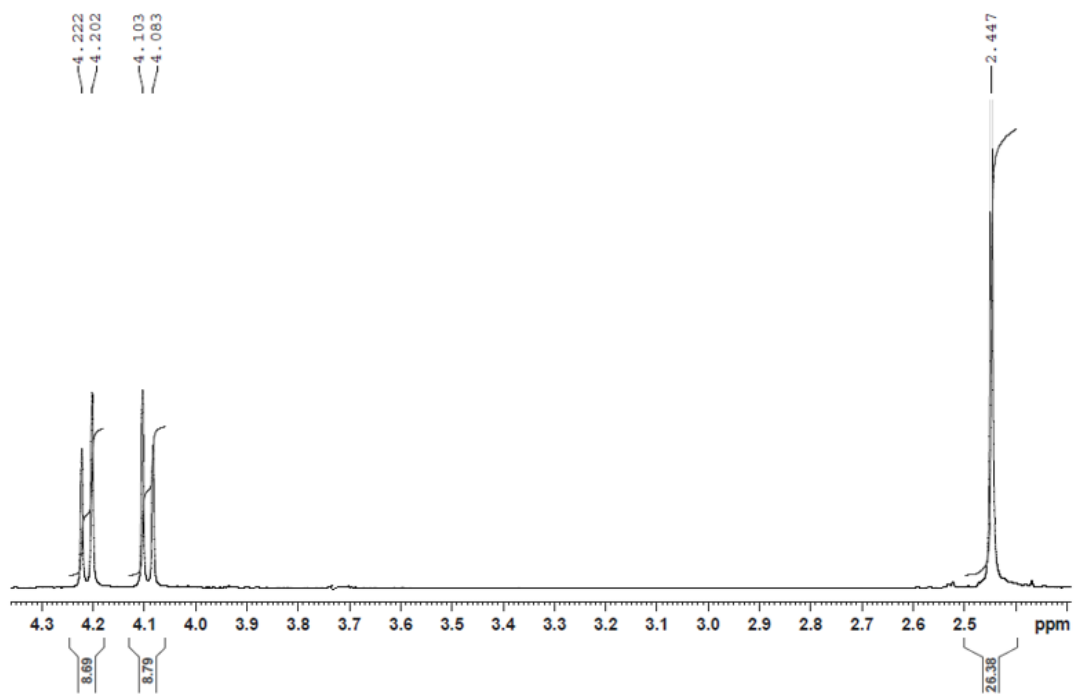

**$^{13}\text{C}$ -NMR (213 MHz;  $\text{CDCl}_3$ ) of compound 8**

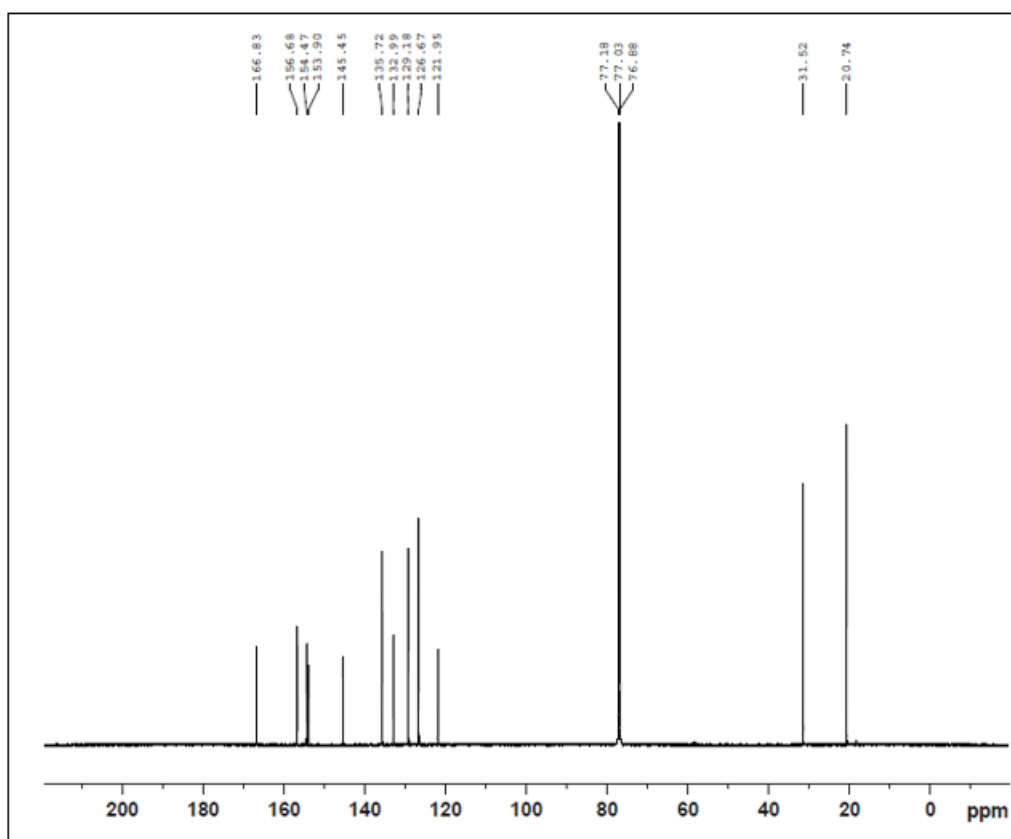

**Expanded  $^{13}\text{C}$ -NMR (213 MHz;  $\text{CDCl}_3$ ) of compound 8**

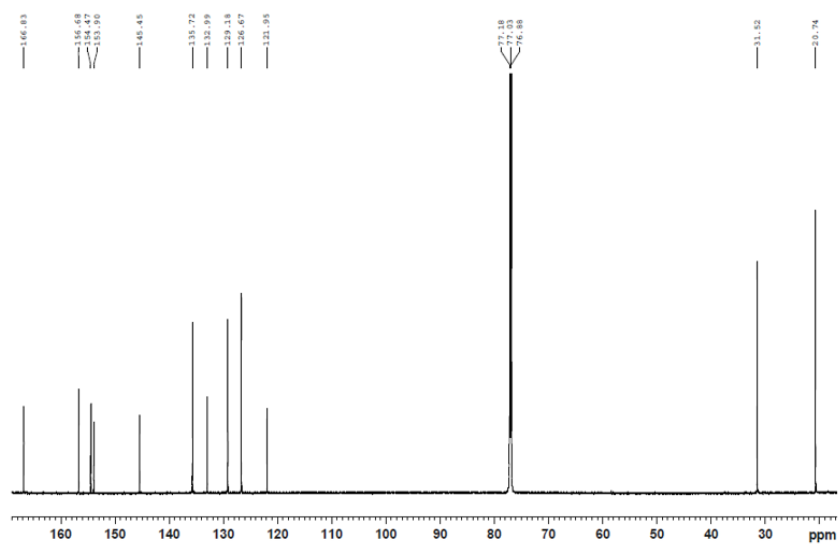

### Compound 10

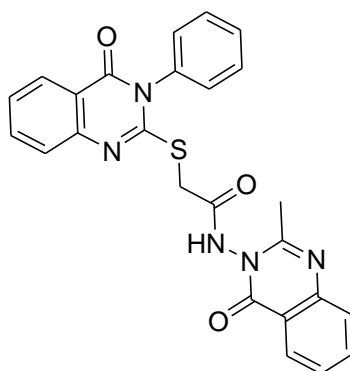

### The $^1\text{H-NMR}$ (850 MHz; $\text{CDCl}_3$ ) of compound 10

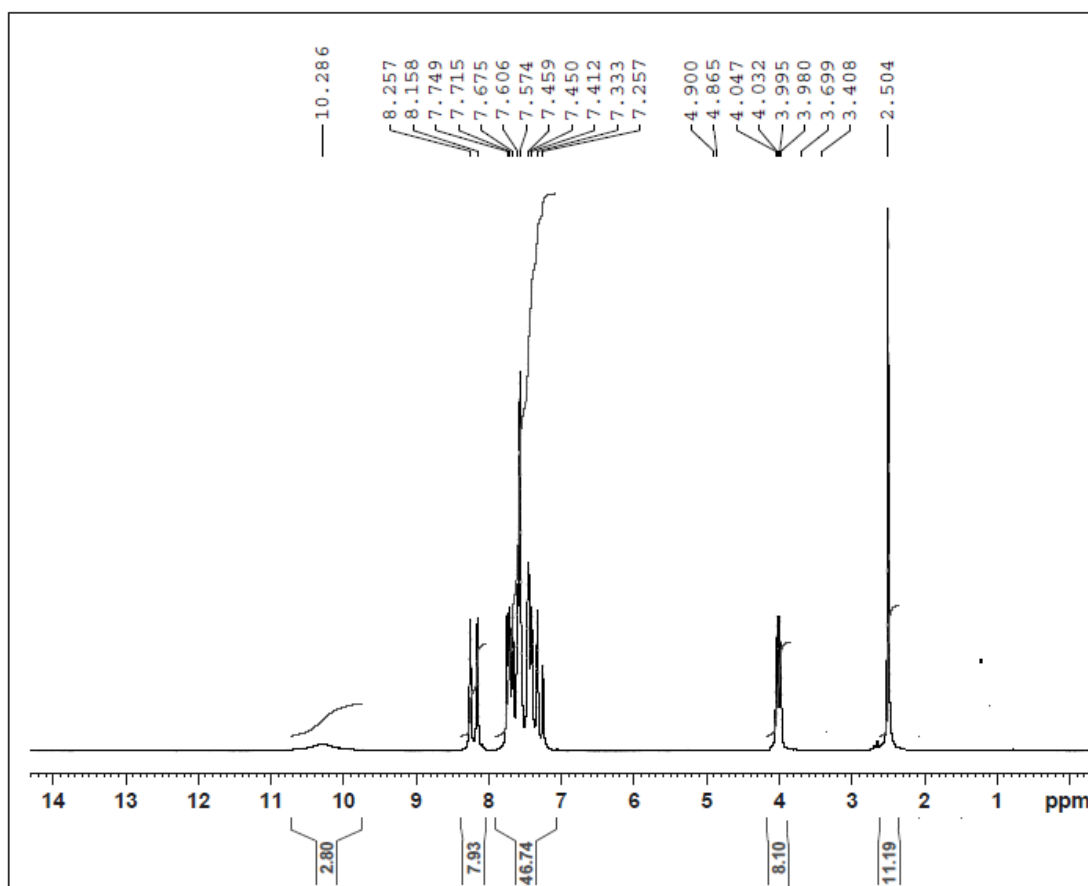

Expanded  $^1\text{H-NMR}$  (850 MHz;  $\text{CDCl}_3$ ) of compound 10

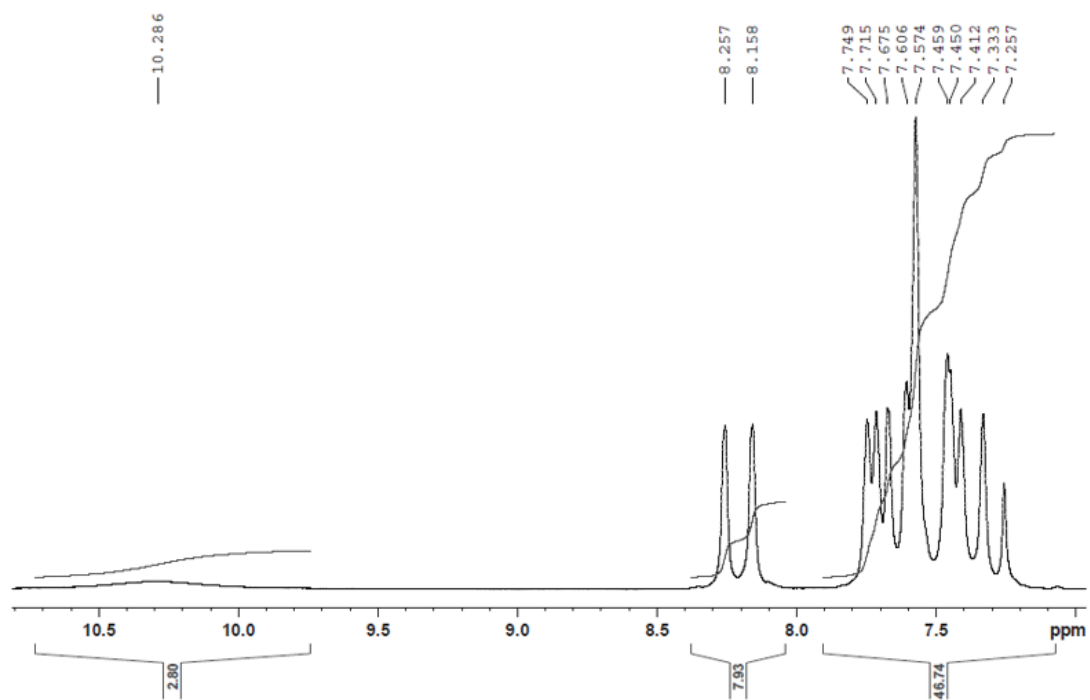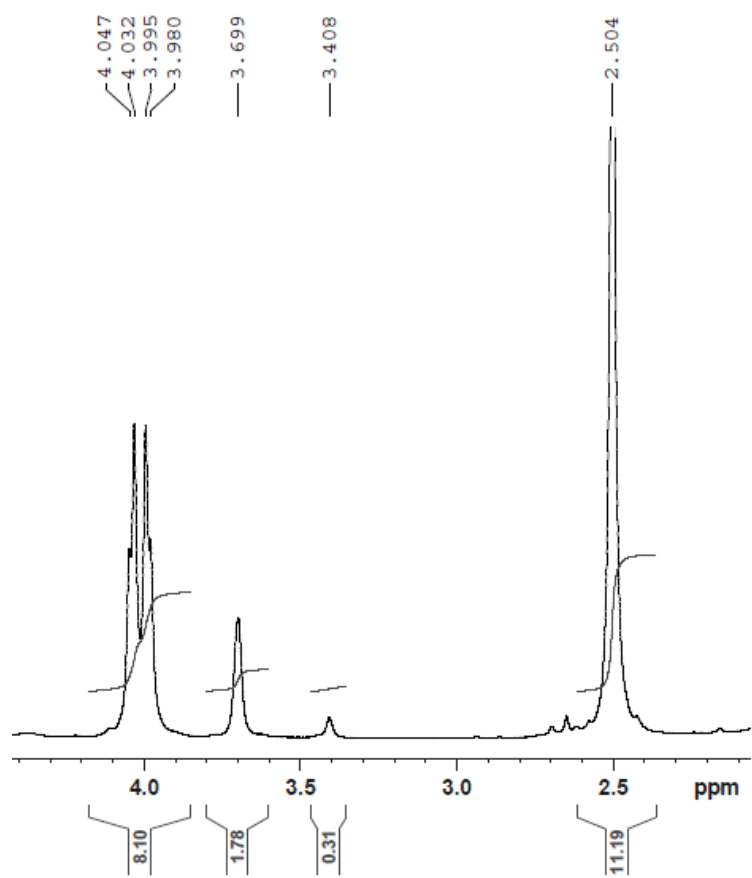



The  $^{13}\text{C}$ -NMR (213 MHz;  $\text{CDCl}_3$ ) of compound 10

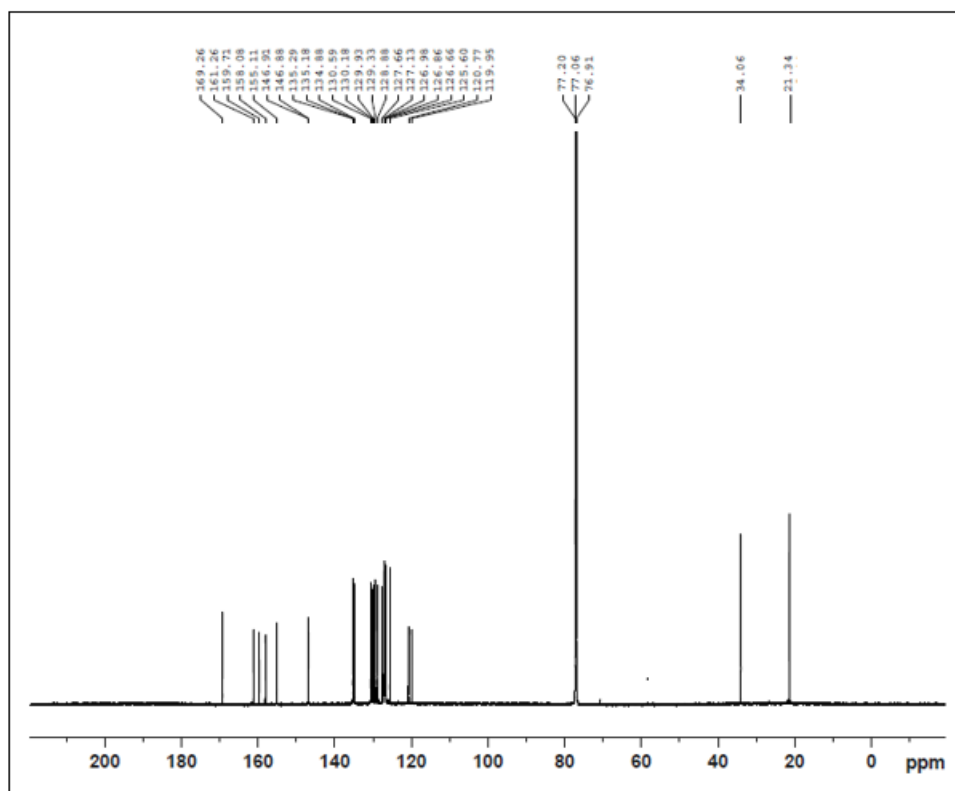

Expanded  $^{13}\text{C}$ -NMR (213 MHz;  $\text{CDCl}_3$ ) of compound 10

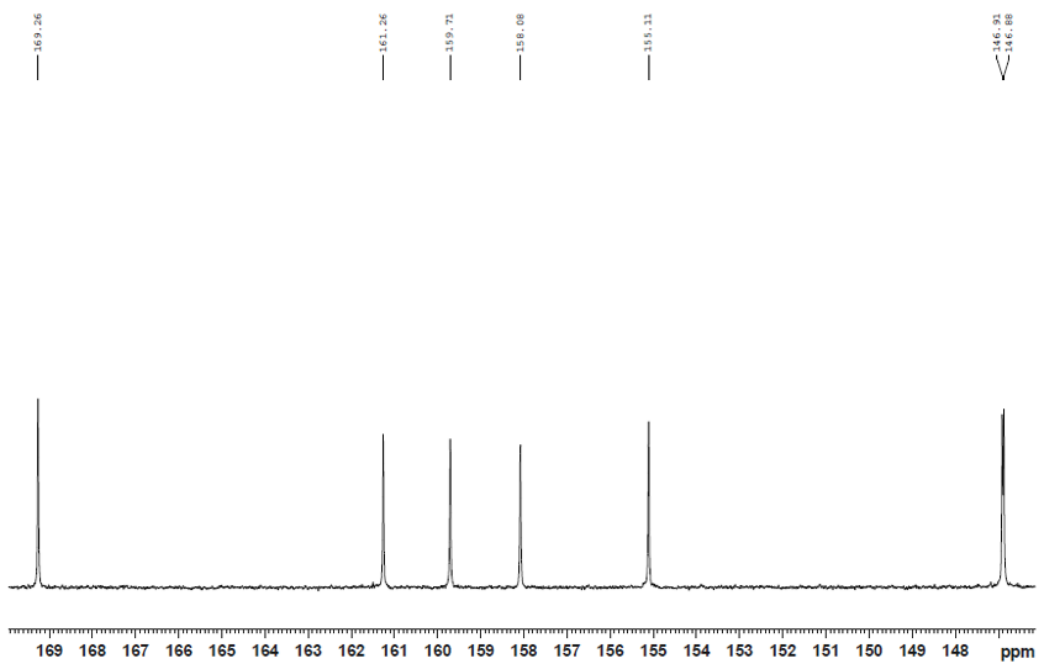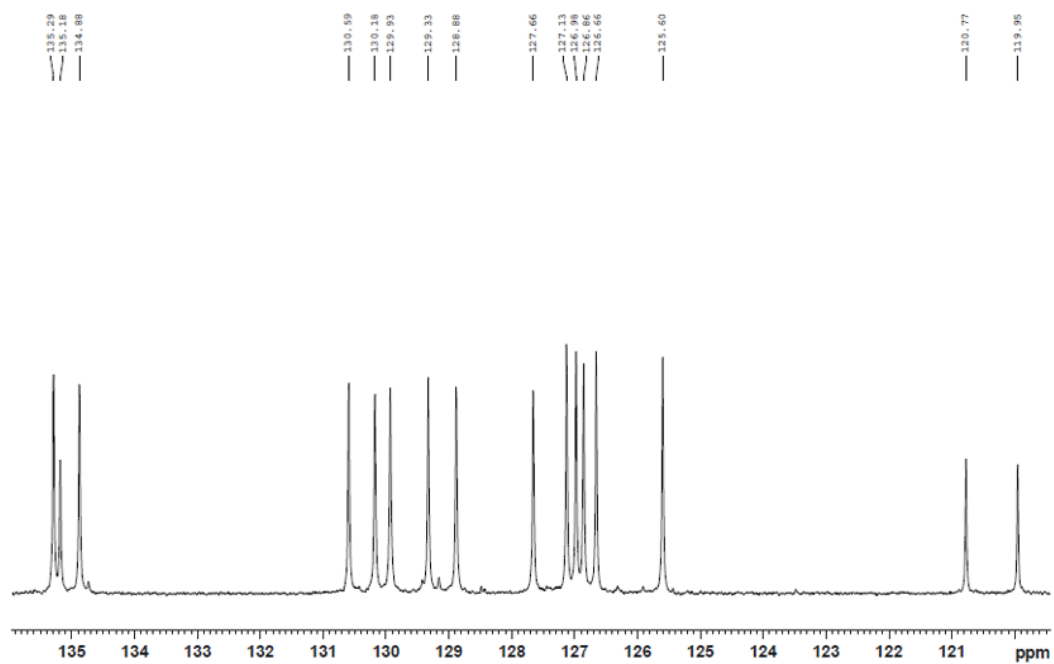

### Compound 12

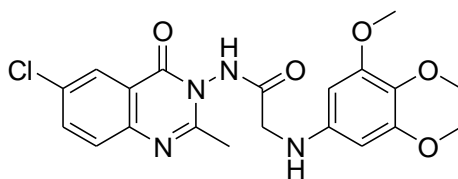

The  $^1\text{H-NMR}$  (850 MHz;  $\text{CDCl}_3$ ) of compound 12

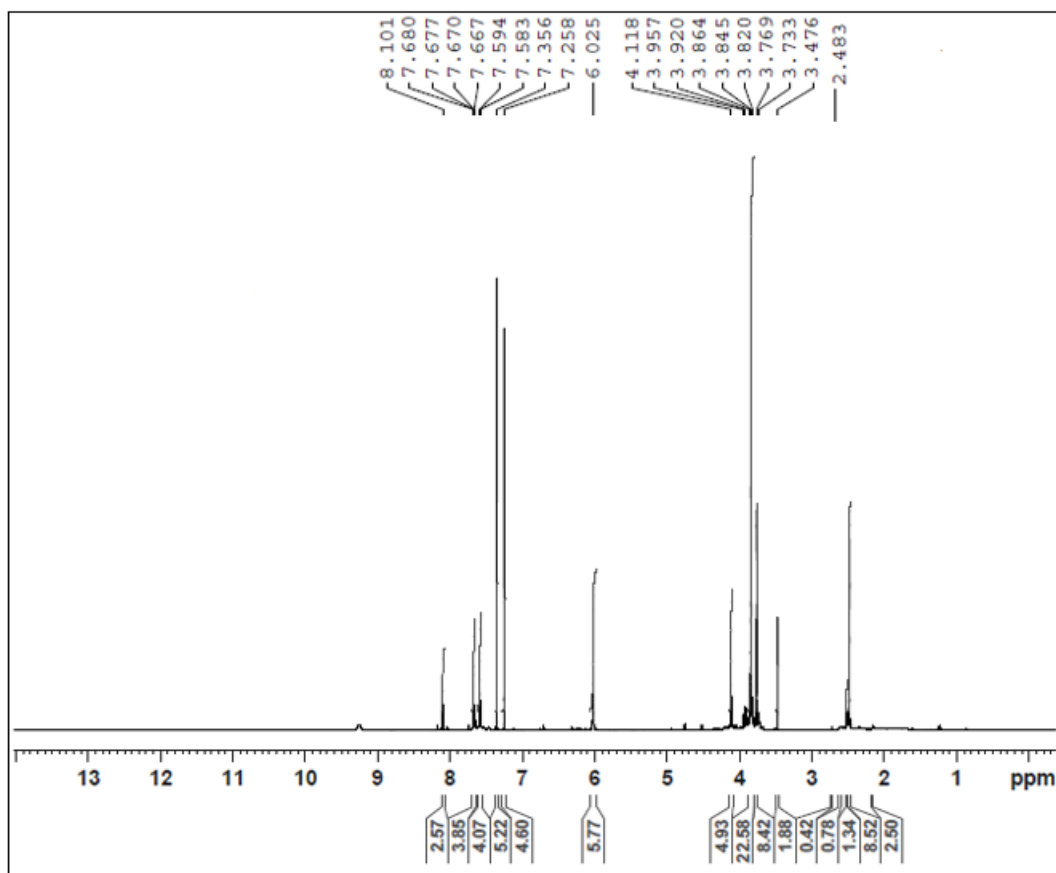

Expanded  $^1\text{H-NMR}$  (850 MHz;  $\text{CDCl}_3$ ) of compound 12

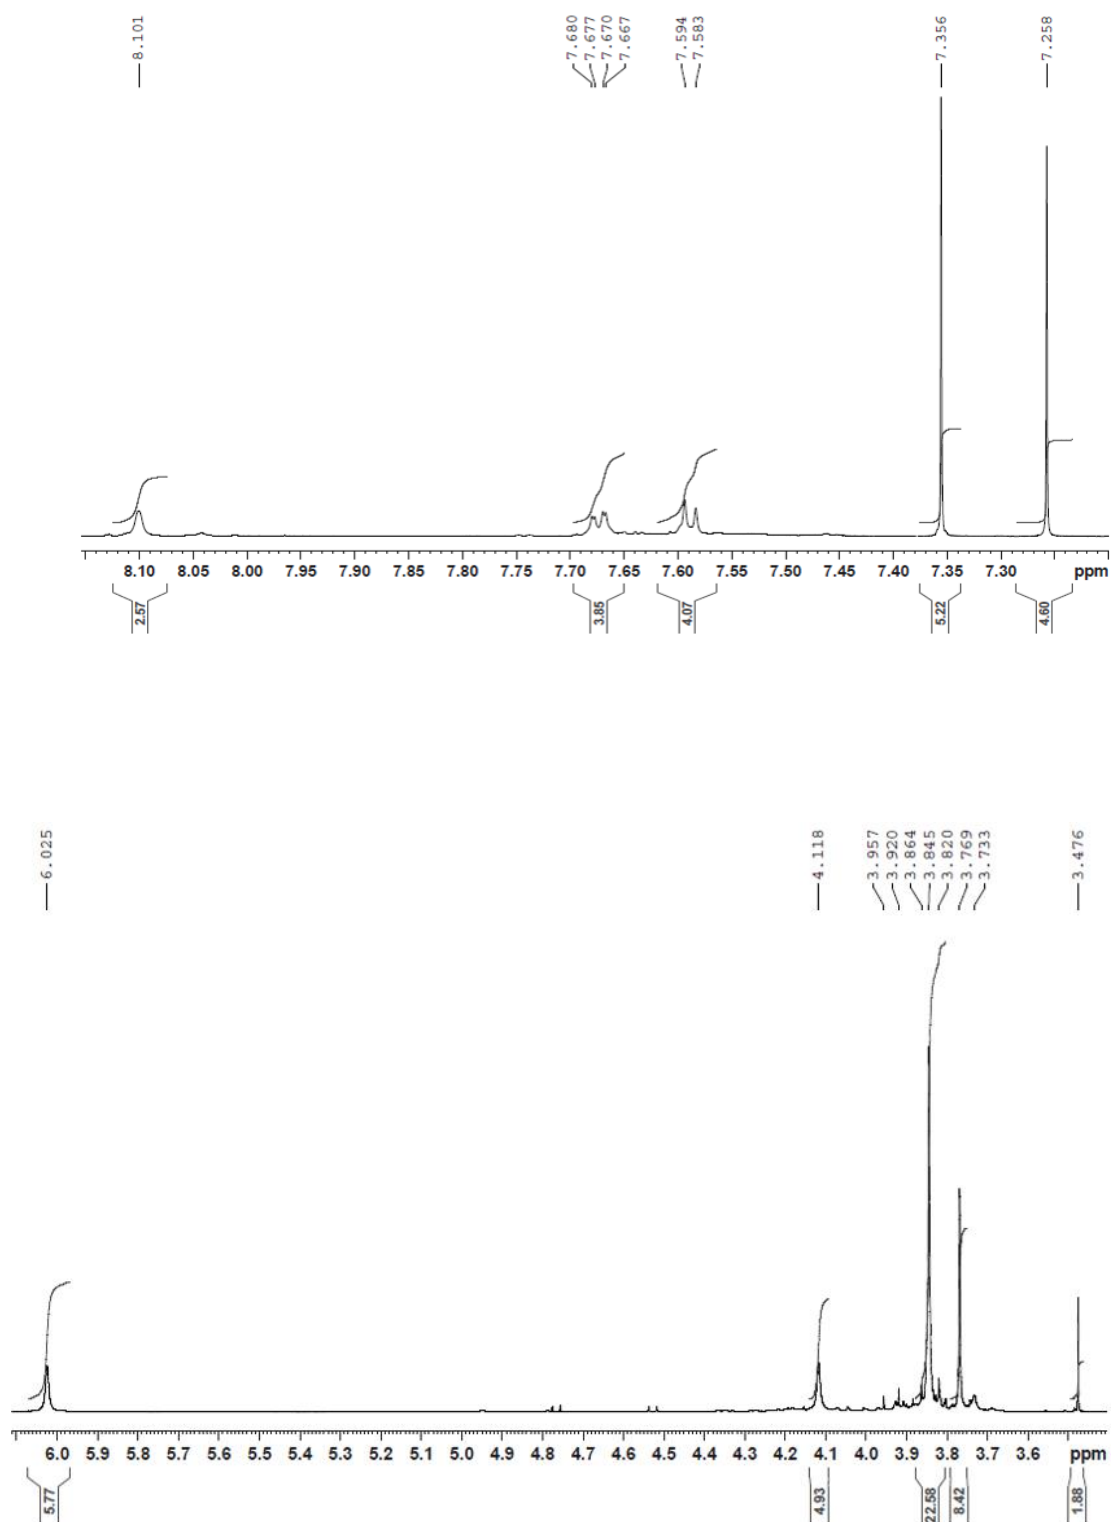

The  $^{13}\text{C}$ -NMR (213 MHz;  $\text{CDCl}_3$ ) of compound 12

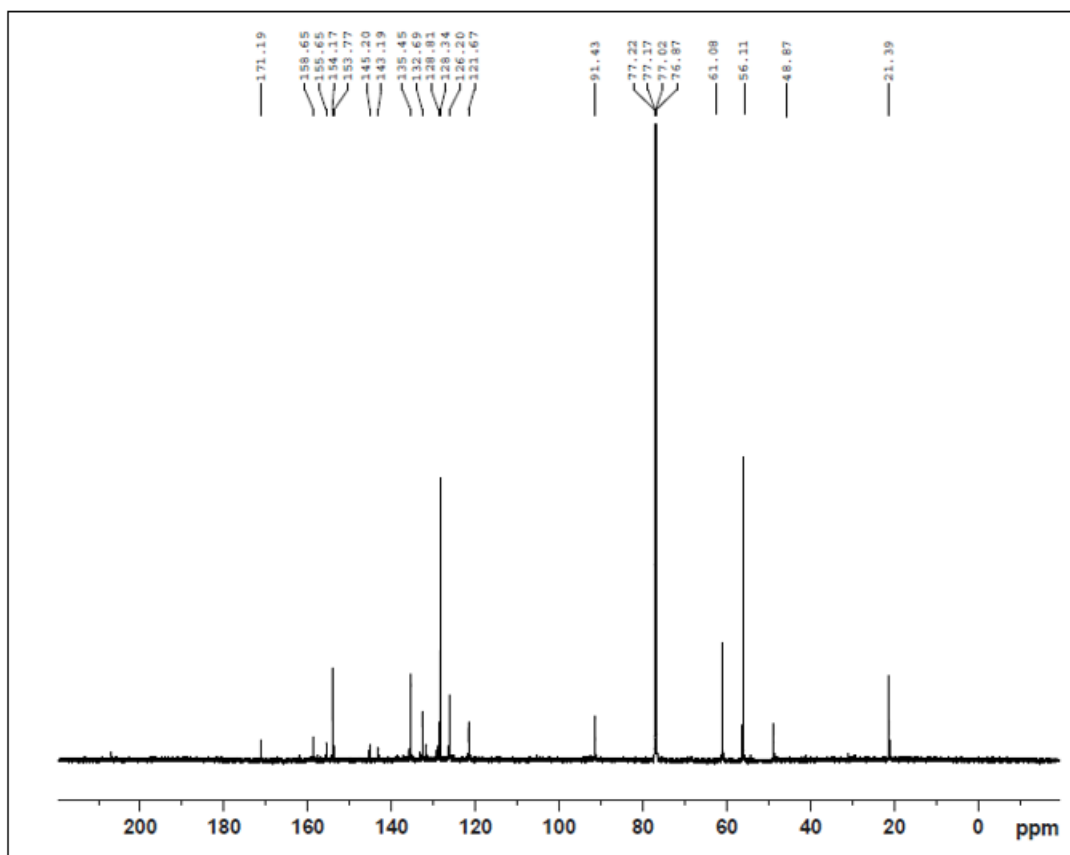

Supplement: ao2c00812_si_001.pdf [file ao2c00812_si_001.pdf]
